# Supplementary material
Source: publisher site journal article supplement (https://www.dovepress.com/article/127335)
Supplement: Supplementary file 1 [file get_supplementary_file.php]

# Electronic Supplementary Material

**Effects of chemopreventive agents on the incidence of recurrent colorectal adenomas:  
A systematic review with network meta-analysis of randomized controlled trials**

Sajesh K Veettil, Nattawat Teerawattanapong, Siew Mooi Ching, Kean Ghee Lim,  
Surasak Saokaew, Pochamana Phisalprapa, Nathorn Chaiyakunapruk

December 8<sup>th</sup>, 2016

## Search strategies

**Table S1 Search algorithms as per the parent study design**

|     |                                                                                                                                                                           |
|-----|---------------------------------------------------------------------------------------------------------------------------------------------------------------------------|
| #1  | Adenoma                                                                                                                                                                   |
| #2  | Adenoma\$                                                                                                                                                                 |
| #3  | Adenocarcinoma                                                                                                                                                            |
| #4  | Adenomatous\$                                                                                                                                                             |
| #5  | Adenomatous polyps                                                                                                                                                        |
| #6  | Colon cancer\$                                                                                                                                                            |
| #7  | Colon neoplas\$                                                                                                                                                           |
| #8  | Colon tumor\$                                                                                                                                                             |
| #9  | Colonic cancer\$                                                                                                                                                          |
| #10 | Colonic neoplas\$                                                                                                                                                         |
| #11 | Colonic neoplasms                                                                                                                                                         |
| #12 | Colonic polyps                                                                                                                                                            |
| #13 | Colonic tumor\$                                                                                                                                                           |
| #14 | Colorectal cancer\$                                                                                                                                                       |
| #15 | Colorectal neoplas\$                                                                                                                                                      |
| #16 | Colorectal neoplasms                                                                                                                                                      |
| #17 | Colorectal tumor\$                                                                                                                                                        |
| #18 | Intestinal polyps                                                                                                                                                         |
| #19 | Polyp\$                                                                                                                                                                   |
| #20 | Rectal cancer\$                                                                                                                                                           |
| #21 | Rectal neoplas\$                                                                                                                                                          |
| #22 | Rectal neoplasms                                                                                                                                                          |
| #23 | Rectal tumor\$                                                                                                                                                            |
| #24 | Rectum cancer\$                                                                                                                                                           |
| #25 | Rectum neoplas\$                                                                                                                                                          |
| #26 | Rectum tumor\$                                                                                                                                                            |
| #27 | #1 OR #2 OR #3 OR #4 OR #5 OR #6 OR #7 OR #8 OR #9 OR #10 OR #11 OR #12 OR #13 OR #14 OR #15 OR #16 OR #17 OR #18 OR #19 OR #20 OR #21 OR #22 OR #23 OR #24 OR #25 OR #26 |
| #28 | Aspirin                                                                                                                                                                   |
| #29 | Acetylsalicylic acid                                                                                                                                                      |
| #30 | COX-1 inhibitor\$                                                                                                                                                         |
| #31 | COX-2 inhibitor\$                                                                                                                                                         |
| #32 | COX-2 selective inhibitor\$                                                                                                                                               |
| #33 | Coxib\$                                                                                                                                                                   |
| #34 | Cyclooxygenase 1 inhibitor\$                                                                                                                                              |
| #35 | Cyclooxygenase 2 inhibitor\$                                                                                                                                              |
| #36 | Cyclooxygenase 2 inhibitors                                                                                                                                               |
| #37 | Cyclooxygenase inhibitor\$                                                                                                                                                |
| #38 | Cyclo-oxygenase inhibitor\$                                                                                                                                               |

|     |                                                                                                                            |
|-----|----------------------------------------------------------------------------------------------------------------------------|
| #39 | Cyclooxygenase inhibitors                                                                                                  |
| #40 | Nonsteroidal antiinflammatory\$                                                                                            |
| #41 | Non-steroidal antiinflammatory\$                                                                                           |
| #42 | Nonsteroidal anti-inflammatory\$                                                                                           |
| #43 | Non-steroidal anti-inflammatory\$                                                                                          |
| #44 | Anti-inflammatory agents, non-steroidal                                                                                    |
| #45 | NSAID\$                                                                                                                    |
| #46 | #28 OR #29 OR #30 OR #31 OR #32 OR #33 OR #34 OR #35 OR #36 OR #37 OR #38 OR #39 OR #40 OR #41 OR #42 OR #43 OR #44 OR #45 |
| #47 | Folate\$                                                                                                                   |
| #48 | Folic\$                                                                                                                    |
| #49 | Folic acid                                                                                                                 |
| #50 | #47 OR #48 OR #49                                                                                                          |
| #51 | Calcium                                                                                                                    |
| #52 | Calcium\$                                                                                                                  |
| #53 | Calcium, dietary                                                                                                           |
| #54 | #51 OR #52 OR #53                                                                                                          |
| #55 | Cholecalciferol                                                                                                            |
| #56 | Cholecalciferol\$                                                                                                          |
| #57 | Ergocalciferol\$                                                                                                           |
| #58 | Ergocalciferols                                                                                                            |
| #59 | Vitamin D                                                                                                                  |
| #60 | #55 OR #56 OR #57 OR #58 OR #59                                                                                            |
| #61 | Antioxidant\$                                                                                                              |
| #62 | Anti-oxidant\$                                                                                                             |
| #63 | Antioxidants                                                                                                               |
| #64 | Ascorbic acid                                                                                                              |
| #65 | Vitamin C                                                                                                                  |
| #66 | Vitamin A                                                                                                                  |
| #67 | Beta-carotene                                                                                                              |
| #68 | Carotenoid\$                                                                                                               |
| #69 | Carotenoids                                                                                                                |
| #70 | Selenium                                                                                                                   |
| #71 | Tocopherol\$                                                                                                               |
| #72 | Tocopherols                                                                                                                |
| #73 | Tocotrienol\$                                                                                                              |
| #74 | Tocotrienols                                                                                                               |
| #75 | Alpha-tocopherol\$                                                                                                         |
| #76 | Vitamin E                                                                                                                  |
| #77 | #61 OR #62 OR #63 OR #64 OR #65 OR #66 OR #67 OR #68 OR #69 OR #70 OR #71 OR #72 OR #73 OR #74 OR #75 OR #76               |
| #78 | Clinical trial                                                                                                             |
| #79 | Controlled clinical trial                                                                                                  |
| #80 | Single blind method                                                                                                        |

|                                                                                                                                                                                                                                                                                            |                                                                    |
|--------------------------------------------------------------------------------------------------------------------------------------------------------------------------------------------------------------------------------------------------------------------------------------------|--------------------------------------------------------------------|
| #81                                                                                                                                                                                                                                                                                        | Double blind method                                                |
| #82                                                                                                                                                                                                                                                                                        | Placebo                                                            |
| #83                                                                                                                                                                                                                                                                                        | Placebo\$                                                          |
| #84                                                                                                                                                                                                                                                                                        | Random\$                                                           |
| #85                                                                                                                                                                                                                                                                                        | Random allocation                                                  |
| #86                                                                                                                                                                                                                                                                                        | Randomized controlled trial                                        |
| #87                                                                                                                                                                                                                                                                                        | Randomized controlled trials                                       |
| #88                                                                                                                                                                                                                                                                                        | #78 OR #79 OR #80 OR #81 OR #82 OR #83 OR #84 OR #85 OR #86 OR #87 |
| #89                                                                                                                                                                                                                                                                                        | #46 OR #50 OR #54 OR #60 OR #77                                    |
| #90                                                                                                                                                                                                                                                                                        | #27 AND #88 AND #89                                                |
| <p>This search strategy (include search terms for both adenomas and colorectal cancer (CRC)) was developed for parent study: a systematic review and network meta-analysis of CPAs for CRC, which has been registered (registration number: CRD42015025849) with PROSPERO, previously.</p> |                                                                    |

**Figure S1 Flow diagram and references of included studies**

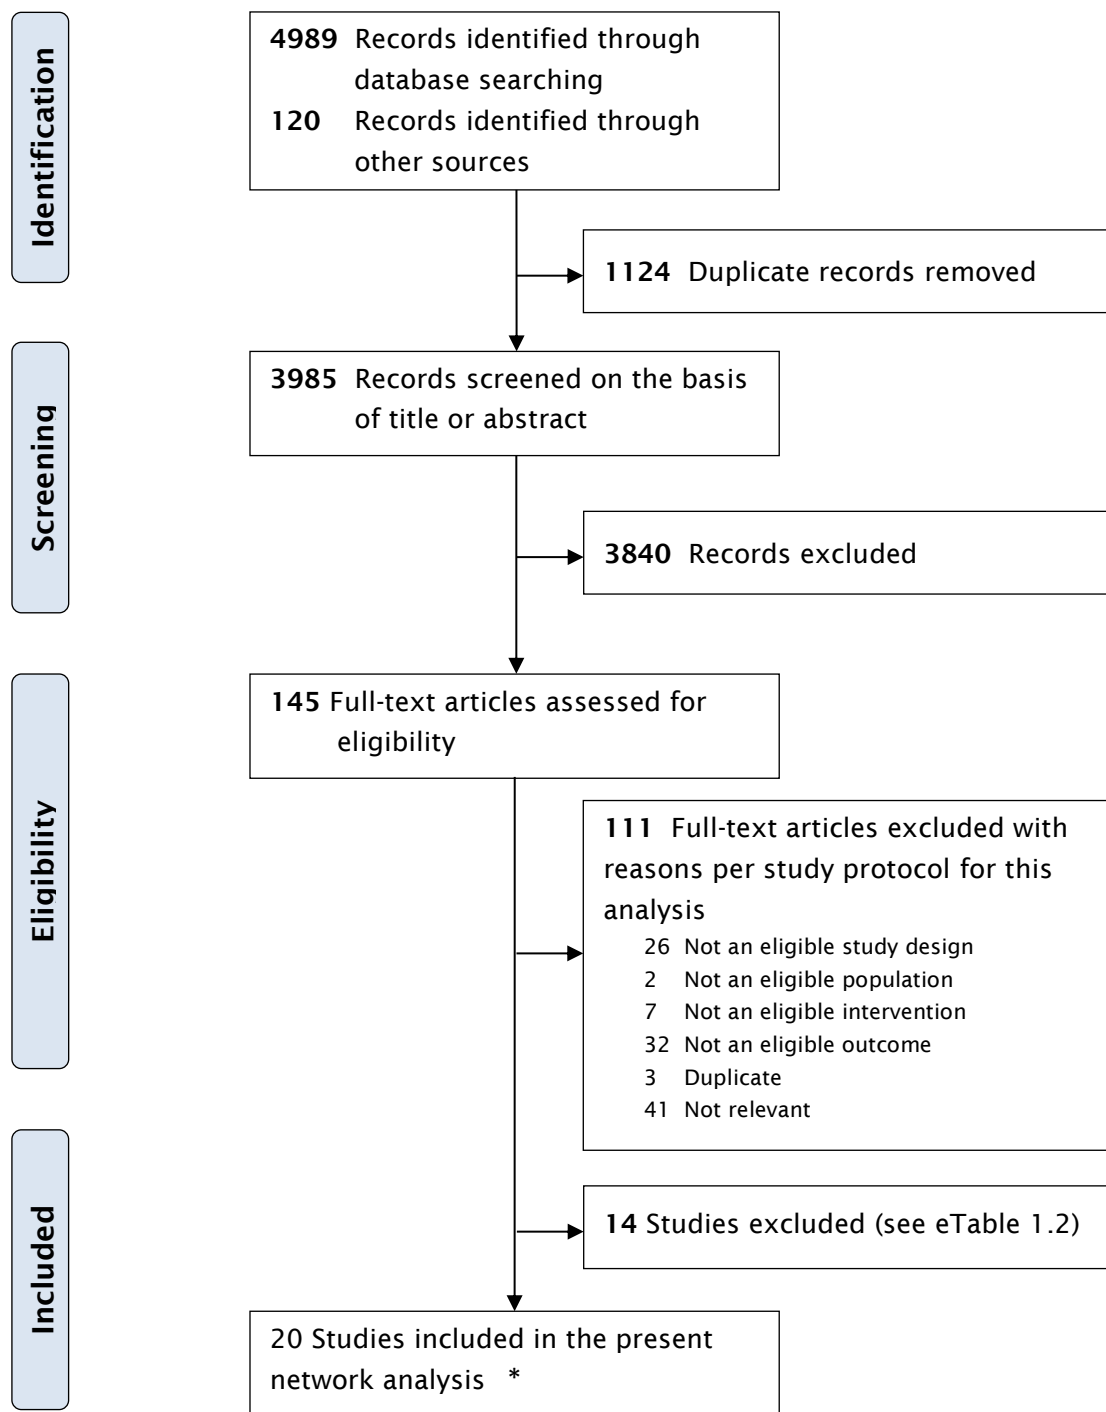

\*This flow diagram represent the results based on search strategy given in eTable 1.1 (parent study). Among 20 eligible RCTs (reported adenoma incidence), one RCT Baron et al. (2015) presented two sets of data (provided by the author on request). In this trial, subjects randomized separately into 2 arms; factorial arm (both male and female) and 2-arm (only female). Hence, we analyzed the data separately for two arms (as 2 studies, Baron 2015a and Baron 2015b).

**Table S2 Reasons for exclusion of studies**

| Authors<br>(citation)                                                  | Reasons for exclusion                                                                                                                                                                                                                                                                                                                                                                                                                                                                                                 |
|------------------------------------------------------------------------|-----------------------------------------------------------------------------------------------------------------------------------------------------------------------------------------------------------------------------------------------------------------------------------------------------------------------------------------------------------------------------------------------------------------------------------------------------------------------------------------------------------------------|
| Ladenheim et al.<br>(Gastroenterology.<br>1995;108(4):1083-7.)         | Randomized placebo trial.<br>Interventions and participants: sulindac 300mg/day (n=44); placebo (n=40).<br>Primary outcome is percentage of patients for whom all polyps either disappeared or regressed. Incidence of adenoma not reported.                                                                                                                                                                                                                                                                          |
| Baron et al.<br>(Ann N Y Acad Sci.<br>1999;889:138-45.)                | Duplicate of Baron et al., 1999 study (N Engl J Med. 1999;340(2):101-7.).                                                                                                                                                                                                                                                                                                                                                                                                                                             |
| Baron et al.<br>(N Engl J Med 2003; 348:891-9.)                        | Aspirin/Folate Polyp Prevention Study (AFPPS): three by-two factorial design RCT, comparing 81 mg and 325 mg of aspirin per day with placebo and comparing 1 mg of folic acid per day with placebo, reported in two papers (Baron et al. 2003 and Cole et al. 2007). Baron et al. 2003 reported only aspirin arm results compared to no intervention. Cole et al. 2007 (JAMA 2007; 297:2351-9.), reported the event rates of all the arms (including aspirin and folic acid).                                         |
| Benamouzig et al.<br>(Gastroenterology.<br>2003;125(2):328-36.)        | The latest 4-year results of this study available; we used the results from Benamouzig et al., 2012 (Gut. 2012;61(2):255-61.) for our analysis.                                                                                                                                                                                                                                                                                                                                                                       |
| Baron et al.<br>(Gastroenterology.<br>2006;131(6):1674-82.)            | Randomized, double-blind, placebo-controlled trial.<br>Interventions and participants: rofecoxib 25 mg/day (n=1,277); Placebo (n=1,293).<br>Rofecoxib was withdrawn from the market; and therefore excluded.                                                                                                                                                                                                                                                                                                          |
| Jaszewski et al.<br>(World J Gastroenterol.<br>2008;14(28):4492-8.)    | Did not report event data (only mean number of adenoma).                                                                                                                                                                                                                                                                                                                                                                                                                                                              |
| Meyskens et al.<br>(Cancer Prev Res Phila Pa.<br>2008;1(1):32-8.)      | Randomized placebo-controlled, double-blind trial.<br>Interventions and participants: difluoromethylornithine (DFMO) 500 mg and sulindac 150 mg (n=191); placebo (n=184)<br>No separate arm for sulindac. DFMO itself a chemopreventive agent; hence the results from this RCT cannot assign only to sulindac.                                                                                                                                                                                                        |
| Bertagnolli et al.<br>(Cancer Prev Res Phila Pa.<br>2009;2(4):310-21.) | Post-trial results of the Adenoma Prevention with Celecoxib (APC) trial.                                                                                                                                                                                                                                                                                                                                                                                                                                              |
| Grau et al.<br>(J Natl Cancer Inst.<br>2009;101(4):267-76.)            | Post-trial results of Aspirin/Folate Polyp Prevention Study (AFPPS).                                                                                                                                                                                                                                                                                                                                                                                                                                                  |
| Benamouzig et al.<br>(Curr Colorectal Cancer Rep.<br>2010;7(1):33-41.) | Duplicate of Benamouzig et al., 2012 study (Gut. 2012;61(2):255-61.).                                                                                                                                                                                                                                                                                                                                                                                                                                                 |
| Arber et al.<br>(Am J Gastroenterol.<br>2011;106(6):1135-46.)          | Post-trial results of the Prevention of Colorectal Sporadic Adenomatous Polypos (Pre SAP) study.                                                                                                                                                                                                                                                                                                                                                                                                                      |
| Li et al.<br>(Chinese J Med Guide.<br>2011;13:89.)                     | This study was identified from the reference list of Zhao et al. review (Asian Pac J Cancer Prev. 2016;17(5):2711-7.). As per their description, this paper retrieved from "Chinese biomedical literature service system (SinoMed) database"; it's a Chinese study written in Chinese language; and graded as low quality. We searched "Chinese biomedical literature service system (SinoMed) database" to retrieve this article. Unfortunately, we were not able to identify the full text of this study. Hence, we |

| Authors<br>(citation)                                                                      | Reasons for exclusion                                                                                                                                                                                                                                                                                                                                                                                                |
|--------------------------------------------------------------------------------------------|----------------------------------------------------------------------------------------------------------------------------------------------------------------------------------------------------------------------------------------------------------------------------------------------------------------------------------------------------------------------------------------------------------------------|
|                                                                                            | communicated with the authors for getting full text/descriptions of this study. However, we didn't received any reply. Moreover, the data obtained from Zhao et al. review for this study showed a control event rate (adenoma incidence) of 80% (39/49), which is too higher than what we saw in other trials (27% to a maximum of 47%). We think that, this study is only a comparative clinical study not an RCT. |
| Takayama et al.<br>(Clin Cancer Res Off J Am<br>Assoc Cancer Res.<br>2011;17(11):3803-11.) | Duration of treatment is only 2 months and follow-up $\approx$ 1 year.<br>Interventions and participants: sulindac 300 mg/day (n=60); etodolac 400 mg/day (n=61); placebo (n=58).                                                                                                                                                                                                                                    |
| Bonelli et al.<br>(J Gastroenterol.<br>2013;48(6):698-705.)                                | The latest report of the study is available (Bonelli et al. J Gastroenterol 2013; 48:698-705.).                                                                                                                                                                                                                                                                                                                      |

## Description of included studies, interventions, and outcomes

**Table S3 Characteristics of eligible randomized controlled trials**

| Authors (year)                  | Location      | Intervention (No. of patients randomized)                                                                                                                                                                             | Study size (total No. of patients) | Age (years)    | % Male | Remarks                                                                             | % of randomized participants excluded from main analyses                                                                                                                    |
|---------------------------------|---------------|-----------------------------------------------------------------------------------------------------------------------------------------------------------------------------------------------------------------------|------------------------------------|----------------|--------|-------------------------------------------------------------------------------------|-----------------------------------------------------------------------------------------------------------------------------------------------------------------------------|
| McKeown-Eyssen et al. (1988)[1] | Canada        | Vitamin C 400 mg/day + vitamin E 400 mg/day (n = 96)<br>Placebo (n = 89)                                                                                                                                              | 185                                | (mean 58)      | 65     | Participants with history of adenomas (post-polypectomy – not clear).               | 26% excluded from analysis as no follow-up colonoscopy.                                                                                                                     |
| Roncucci et al. (1993)[2]       | Italy         | Vitamin A 30,000 IU + vitamin C 1 g + vitamin E 70 mg/day (n = 70)<br>Lactulose 20 g/day (n = 61)<br>No intervention (n = 78)                                                                                         | 209                                | (mean 59)      | 62     | Participants with history of adenomas; and documented clean colon post-polypectomy. | 10% had no follow-up colonoscopy and 28% had no follow-up beyond 1 year, but these patients were included in the analysis; presumably assumed no polyps for these patients. |
| Greenberg et al. (1994)[3]      | United States | Beta-carotene (n = 217)<br>Vitamin C + vitamin E (n = 225)<br>Beta-carotene + vitamin C + vitamin E (n = 208)<br>Placebo (n = 214)                                                                                    | 864                                | < 80 (mean 61) | 79     | Participants with history of adenomas; and documented clean colon post-polypectomy. | 13% excluded from 4-year analysis as no follow-up colonoscopy.                                                                                                              |
| MacLennan et al. (1995)[4]      | Australia     | Beta-carotene (n = 53)<br>Beta-carotene + bran (n = 47)<br>Beta-carotene + LFD (n = 51)<br>Beta-carotene + LFD + bran (n = 50)<br>Normal eating + placebo (n = 48)<br>Bran + placebo (n=50)<br>LFD + placebo (n = 48) | 395                                | 30–74          | 67     | Documented polyp free colon.                                                        | 26% excluded from analysis as no follow-up colonoscopy.                                                                                                                     |



| Authors (year)                                    | Location       | Intervention (No. of patients randomized)                                                                                                                                                        | Study size (total No. of patients) | Age (years)       | % Male | Remarks                                                                                                           | % of randomized participants excluded from main analyses       |
|---------------------------------------------------|----------------|--------------------------------------------------------------------------------------------------------------------------------------------------------------------------------------------------|------------------------------------|-------------------|--------|-------------------------------------------------------------------------------------------------------------------|----------------------------------------------------------------|
|                                                   |                | LFD + bran + placebo (n = 48)                                                                                                                                                                    |                                    |                   |        |                                                                                                                   |                                                                |
| Ponz de Leon et al. (1997)[5]                     | Italy          | Vitamin A 30,000 IU + vitamin C 1 g + vitamin E 70 mg, all given every other day (n = 36)<br>N-acetylcysteine 600 mg/day (n = 33)<br>Placebo (n = 34)                                            | 140                                | NA                | NA     | Participants with history of adenomas (post-polypectomy - not clear).                                             | 26%) not evaluated yet but only preliminary analysis reported. |
| Hofstad et al. (1998)[6]                          | Norway         | Calcium (elemental calcium) 1,600 mg/day + beta-carotene 15 mg/day + vitamin C 150 mg/day + vitamin E 75 mg/day + selenium 101 µg/day (n = 42)<br>Placebo (n = 51)                               | 116                                | 50-76 (median 67) | 51     | Participants with history of adenomas (polyps of 1-9 mm in diameter were removed; remaining polyps left in situ). | 20% excluded from analysis.                                    |
| Baron et al. (1999)[7]                            | United States  | Calcium (elemental calcium) 1,200 mg/day (n = 464)<br>Placebo (n = 466)                                                                                                                          | 930                                | ≤ 80 (mean 61)    | 72     | Participants with history of adenomas; and all polyps removed and pathologically examined before study.           | 11% excluded from analysis as no follow-up colonoscopy.        |
| Bonithon-Kopp et al. (2000)[8]                    | Multi-national | Calcium (elemental calcium) 2,000 mg/day (n = 218)<br>Placebo (n = 221)                                                                                                                          | 439                                | 35-75 (mean 59)   | 63     | Participants with history of adenomas; and documented clean colon post-polypectomy.                               | 15% excluded from analysis as no follow-up colonoscopy.        |
| Baron et al. (2003)[9]/<br>Cole et al. (2007)[10] | United States  | ASA 81 mg/day (n=169)<br>ASA 325 mg/day (n=167)<br>ASA 81 mg/day + folic acid 1 mg/day (n=175)<br>ASA 325 mg/day + folic acid 1 mg/day (n=171)<br>Folic acid 1 mg/day (n=170)<br>Placebo (n=169) | 1,021                              | 21-81 (mean 57)   | 64     | Participants with history of adenomas; and documented clean colon post-polypectomy.                               | 3% excluded from analysis as no follow-up colonoscopy.         |

| Authors (year)                | Location       | Intervention (No. of patients randomized)                                                                                   | Study size (total No. of patients) | Age (years)           | % Male | Remarks                                                                                                                                                                                    | % of randomized participants excluded from main analyses                    |
|-------------------------------|----------------|-----------------------------------------------------------------------------------------------------------------------------|------------------------------------|-----------------------|--------|--------------------------------------------------------------------------------------------------------------------------------------------------------------------------------------------|-----------------------------------------------------------------------------|
| Sandler et al. (2003)[11]     | United States  | ASA 325 mg/day (n=317)<br>Placebo (n=318)                                                                                   | 635                                | 30-80                 | 52     | Participants with of histologically documented colon or rectal cancer with a low risk of recurrent disease; and documented clean colon post-polypectomy.                                   | 19% excluded from analysis as no follow-up colonoscopy.                     |
| Arber et al. (2006)[12]       | Multi-national | Cele 400 mg/day (n=933)<br>Placebo (n=628)                                                                                  | 1,561                              | 30-92 (mean 61)       | 66     | Participants with history of adenomas; and documented clean colon post-polypectomy.                                                                                                        | 11% excluded from analysis as no follow-up colonoscopy at year 1 or year 3. |
| Bertagnolli et al. (2006)[13] | Multi-national | Cele 400 mg/day (n=685)<br>Cele800 mg/day (n=671)<br>Placebo (n=679)                                                        | 2,035                              | 31-88 (median 59)     | 68     | Participants with history of adenomas; and documented clean colon post-polypectomy.                                                                                                        | 10% excluded from analysis as no follow-up colonoscopy at year 1 or year 3. |
| Logan et al. (2008)[14]       | UK,Denmark     | ASA 300 mg/day (n=236)<br>Folic acid 0.5 mg/day(n=234)<br>ASA 300 mg/day + folic acid 0.5 mg/day (n=236)<br>Placebo (n=233) | 939                                | 28-75 (mean 58)       | 56     | Participants with history of colorectal adenoma $\geq 0.5$ cm; and documented clean colon post-polypectomy.                                                                                | 10% excluded from analysis as no follow-up colonoscopy.                     |
| Wu et al. (2009)[15]          | United States  | Folic acid 1 mg/day (n=338)<br>Placebo (n=334)                                                                              | 672                                | 50 -78 (mean 57)      | 38     | Participants with history of adenomas (polyps left in situ) from among participants of 2 large prospective cohorts, the Health Professionals Follow-Up Study and the Nurses' Health Study. | 29% excluded from analysis.                                                 |
| Chu et al. (2011)[16]         | United States  | Calcium carbonate 1,800 mg (n=95)<br>Placebo (n=99)                                                                         | 220                                | $\geq 18$ (median 68) | 63     | Participants with history of stage 0, I or II colorectal cancer.                                                                                                                           | 12% excluded from analysis.                                                 |

| Authors (year)              | Location      | Intervention (No. of patients randomized)                                                                                                                                                          | Study size (total No. of patients) | Age (years)     | % Male | Remarks                                                                                                                                                                     | % of randomized participants excluded from main analyses          |
|-----------------------------|---------------|----------------------------------------------------------------------------------------------------------------------------------------------------------------------------------------------------|------------------------------------|-----------------|--------|-----------------------------------------------------------------------------------------------------------------------------------------------------------------------------|-------------------------------------------------------------------|
| Benamouziget al. (2012)[17] | France        | ASA 160 mg/day (n=73)<br>ASA 300 mg/day (n=67)<br>Placebo (n=132)                                                                                                                                  | 272                                | 18-75           | 70     | Participants with history of at least 3 adenomas irrespective of size, or at least one measuring 6 mm in diameter or more; and documented clean colon post-polypectomy.     | 32% excluded from analysis as no follow-up colonoscopy at year 4. |
| Bonelliet al. (2013)[18]    | Italy         | Selenium 200 µg, zinc 30 mg, vitamin A 2 mg, vitamin C 180 mg, vitamin E 30 mg/day (n=200)<br>Placebo (n=211)                                                                                      | 411                                | 25-75 (mean 57) | 62     | Participants with history of adenomas; and documented clean colon post-polypectomy.                                                                                         | 19% excluded from analysis as no follow-up colonoscopy.           |
| Ishikawa et al. (2014)[19]  | Japan         | ASA 100 mg/day (n=191)<br>Placebo (n=198)                                                                                                                                                          | 389                                | 40-70           | 79     | Participants with history of single/multiple colorectal adenomas and/or adenocarcinomas with invasions confined to the mucosa; and documented clean colon post-polypectomy. | 20% excluded from analysis as no follow-up colonoscopy.           |
| Baron et al. (2015)a[20]    | United States | Calcium (elemental calcium) 1,200 mg/day (n=419)<br>Vitamin D3 1,000 IU/day (n=420)<br>Calcium (elemental calcium) 1200 mg + vitamin D3 1,000 IU/day (n=421)<br>Placebo (n=415)<br>[factorial arm] | 1,675                              | 45-75 (mean 59) | 41     | Participants with history of adenomas; and documented clean colon post-polypectomy.                                                                                         | 9% excluded from analysis.                                        |
| Baron et al. (2015)b[20]    | United States | Calcium (elemental calcium) 1,200 mg/day (n=295)<br>Calcium (elemental calcium) 1,200 mg + vitamin D3 1,000 IU/day (n=289)<br>[2 arms]                                                             | 584                                | 45-75 (mean 57) | 0      | Participants with history of adenomas; and documented clean colon post-polypectomy.                                                                                         | 8% excluded from analysis.                                        |

| Authors (year)             | Location       | Intervention (No. of patients randomized)                                                        | Study size (total No. of patients) | Age (years)     | % Male | Remarks                                                                             | % of randomized participants excluded from main analyses |
|----------------------------|----------------|--------------------------------------------------------------------------------------------------|------------------------------------|-----------------|--------|-------------------------------------------------------------------------------------|----------------------------------------------------------|
| Pommegaard et al.2016)[21] | Multi-national | ASA 75 mg/day + calcium carbonate 1250 mg/day + calcitriol 0.5 µg/day (n=557)<br>Placebo (n=550) | 1107                               | 45-75 (mean 59) | 58     | Participants with history of adenomas; and documented clean colon post-polypectomy. | 38.5% excluded from analysis.                            |

**Abbreviations:** ASA, aspirin; Cele, celecoxib; LFD, low-fat diet.

**Table S4 Primary and secondary outcomes of each study**

| Authors (year)                                 | Primary outcome(s)                                   | Secondary outcome(s)                                                                                                                              | Duration of treatment (follow-up schedule)                                                                                        |
|------------------------------------------------|------------------------------------------------------|---------------------------------------------------------------------------------------------------------------------------------------------------|-----------------------------------------------------------------------------------------------------------------------------------|
| McKeown-Eyssen et al. (1988)[1]                | Recurrent colorectal adenomas.                       |                                                                                                                                                   | 2 years (2 years).                                                                                                                |
| Roncucci et al. (1993)[2]                      | Recurrent colorectal adenomas and advanced adenomas. |                                                                                                                                                   | ≈1.5 years (≈ 1.5 years after the baseline examination).                                                                          |
| Greenberg et al. (1994)[3]                     | Recurrent colorectal adenomas.                       |                                                                                                                                                   | 4 years (4 years after the baseline examination).                                                                                 |
| MacLennan et al. (1995)[4]                     | Recurrent colorectal adenomas.                       |                                                                                                                                                   | 2 years (4 years after the baseline examination).                                                                                 |
| Ponz de Leon et al. (1997)[5]                  | Recurrent colorectal adenomas.                       |                                                                                                                                                   | Not reported (<2 years).                                                                                                          |
| Hofstad et al. (1998)[6]                       | Recurrent colorectal adenomas.                       |                                                                                                                                                   | 3 years (3 years).                                                                                                                |
| Baron et al. (1999)[7]                         | Recurrent colorectal adenomas.                       | One or more advanced adenomas.                                                                                                                    | 4 years (analyzed from end year 1 to end year 4).                                                                                 |
| Bonithon-Kopp et al. (2000)[8]                 | Recurrent colorectal adenoma at 3 year examination.  | One or more advanced adenomas.                                                                                                                    | 3 years (3 years after the baseline examination).                                                                                 |
| Baron et al. (2003)[9]/ Cole et al. (2007)[10] | Recurrent colorectal adenomas.                       | Numbers of colorectal adenomas and advanced adenomas.                                                                                             | ≈3 years (3 years after the baseline examination).                                                                                |
| Sandler et al. (2003)[11]                      | Incidence of adenoma.                                | The size of the adenoma; the time to the detection of a first adenoma, and the proportion of patients with advanced adenomas.                     | ≈3 years (participants with early-stage disease at 4 years and all other participants at 3 years after the baseline examination). |
| Arber et al. (2006)[12]                        | Recurrent colorectal adenomas at year 1, 3, or both. | Advanced adenomas at year 1, 3, or both; cardiovascular outcomes and adverse events.                                                              | ≈3 years (1 and 3 years after the baseline examination).                                                                          |
| Bertagnolli et al. (2006)[13]                  | Recurrent colorectal adenomas.                       | Advanced adenomas at year 1, 3, or both; number of adenomas; size of largest adenoma; adenoma burden; cardiovascular outcomes and adverse events. | 3 years (1 and 3 years after the baseline examination).                                                                           |

| Authors (year)               | Primary outcome(s)                                                                                                                         | Secondary outcome(s)                                                                                                                          | Duration of treatment (follow-up schedule)                                                                   |
|------------------------------|--------------------------------------------------------------------------------------------------------------------------------------------|-----------------------------------------------------------------------------------------------------------------------------------------------|--------------------------------------------------------------------------------------------------------------|
| Logan et al. (2008)[14]      | Recurrent colorectal adenomas or adenocarcinomas.                                                                                          | Number of colorectal adenomas detected during follow-up evaluation and recurrent advanced colorectal neoplasia.                               | 3 years (3 years after the baseline examination).                                                            |
| Wu et al. (2009)[15]         | Recurrent of colorectal adenomas.                                                                                                          |                                                                                                                                               | 5-6.5 years ( $\geq 3$ months after initiation of trial and $\leq 12$ months after completion of the trial). |
| Chu et al. (2011)[16]        | Compliance to drugs and colonoscopies; drop-out rate; adverse effects.                                                                     | Rate of new adenomas or advanced adenomas.                                                                                                    | 5 years (5 years after the baseline examination).                                                            |
| Benamouziget al. (2012)[17]  | Recurrent colorectal adenomas, the size of new adenomas, and the adenomatous polyp burden.                                                 | Numbers of recurrent adenomas and numbers of recurrent advanced adenomas.                                                                     | 4 years (4 years after the baseline examination).                                                            |
| Bonelliet al. (2013)[18]     | Recurrent colorectal adenomas.                                                                                                             | Recurrent advanced adenomas.                                                                                                                  | 5 years (median follow-up was 4 years; range 1–15 years after the baseline examination).                     |
| Ishikawa et al. (2014)[19]   | Recurrent colorectal adenomas or adenocarcinomas.                                                                                          | Recurring tumor number, size and histology, and the frequency of adverse effects.                                                             | 2 years (2 years after the baseline examination).                                                            |
| Baron et al. (2015)[20]      | Recurrent adenomas at least 1 year after randomization and up to 6 months after the anticipated 3-year or 5-year colonoscopic examination. | One or more advanced adenomas.                                                                                                                | 5 years (follow-up examination at year 3 or 5).                                                              |
| Pommergaard et al. 2016)[21] | Recurrent colorectal adenomas.                                                                                                             | Advanced adenomas, total number of colorectal adenomas, pathologic classification of the adenomas, the degree of dysplasia, and adenoma size. | $\approx 3$ years (3 years after the baseline examination).                                                  |

**Table S5 Definition of advanced adenomas in each study**

| Authors<br>(year)                                | Definition of advanced adenomas                                                                                                                                                |
|--------------------------------------------------|--------------------------------------------------------------------------------------------------------------------------------------------------------------------------------|
| Roncucci et al.<br>(1993)[2]                     | Tubule-villous adenomas, large adenomas ( $\geq 1$ cm in diameter).                                                                                                            |
| Baron et al.<br>(1999)[7]                        | Advanced adenomas not defined in the original article.                                                                                                                         |
| Bonithon-Kopp et al.<br>(2000)[8]                | Villous or tubule-villous features , or an estimated diameter of at least 1cm.                                                                                                 |
| Baron et al.(2003)[9]/<br>Cole et al. (2007)[10] | Tubule-villous adenomas (25-75% villous features), villous adenomas (more than 75% villous), large adenomas (at least 1 cm in diameter), severe dysplasia, or invasive cancer. |
| Sandler et al.<br>(2003)[11]                     | Adenomas at least 1 cm in diameter or had villous components.                                                                                                                  |
| Arber et al.<br>(2006)[12]                       | Adenoma $\geq 1.0$ cm (villous or tubule-villous histology); high-grade dysplasia; intra-mucosal carcinoma or invasive cancer.                                                 |
| Bertagnolli et al.<br>(2006)[13]                 | Adenoma $\geq 1.0$ cm (villous or tubule-villous histology); high-grade dysplasia; Intra-mucosal carcinoma or invasive cancer.                                                 |
| Logan et al.<br>(2008)[14]                       | Adenomas that were either 1 cm or larger in diameter, villous or tubule-villous, or showed severe dysplasia or invasive cancer.                                                |
| Chu et al.<br>(2011)[16]                         | Villous or tubule-villous features , or an estimated diameter of at least 1cm.                                                                                                 |
| Benamouziget al.<br>(2012)[17]                   | Adenomas with a maximum diameter of at least 10 mm, at least 25% villous elements or evidence of high-grade dysplasia.                                                         |
| Bonelliet al.<br>(2013)[18]                      | Villous adenomas ( $\geq 20\%$ villous features), large adenomas ( $\geq 1$ cm in diameter), adenomas with high-grade dysplasia.                                               |
| Ishikawa et al.<br>(2014)[19]                    | Adenomas with high grade dysplasia.                                                                                                                                            |
| Baron et al.<br>(2015)[20]                       | Adenomas with cancer, high-grade dysplasia, more than 25% villous features, or an estimated diameter of at least 1cm.                                                          |
| Pommergaard et al.<br>2016)[21]                  | Definition was unclear                                                                                                                                                         |

## Risk of bias assessments

**Table S6 Summarized risk of bias of included randomized controlled trials**

| Authors (year)                  | Adequate sequence generation | Allocation concealment | Blinding participants and personnel | Blinding assessor | Incomplete outcome data | Selective outcome reporting | Other sources of bias |
|---------------------------------|------------------------------|------------------------|-------------------------------------|-------------------|-------------------------|-----------------------------|-----------------------|
| McKeown-Eyssen et al. (1988)[1] | ?                            | +                      | +                                   | +                 | -                       | +                           | +                     |
| Roncucci et al. (1993)[2]       | +                            | ?                      | ?                                   | +                 | +                       | +                           | +                     |
| Greenberg et al. (1994)[3]      | +                            | +                      | +                                   | +                 | +                       | +                           | +                     |
| MacLennan et al. (1995)[4]      | +                            | +                      | +                                   | +                 | ?                       | +                           | +                     |
| Ponz de Leon et al. (1997)[5]   | ?                            | ?                      | ?                                   | ?                 | -                       | ?                           | +                     |
| Hofstad et al. (1998)[6]        | ?                            | ?                      | ?                                   | -                 | +                       | +                           | ?                     |
| Baron et al. (1999)[7]          | +                            | +                      | +                                   | +                 | +                       | +                           | +                     |
| Bonithon-Kopp et al. (2000)[8]  | +                            | +                      | +                                   | +                 | +                       | +                           | +                     |
| Sandler et al. (2003)[11]       | +                            | +                      | +                                   | +                 | +                       | +                           | +                     |
| Arber et al. (2006)[12]         | +                            | +                      | +                                   | +                 | +                       | +                           | +                     |
| Bertagnolli et al. (2006)[13]   | +                            | +                      | +                                   | +                 | +                       | +                           | +                     |
| Cole et al. (2007)[10]          | +                            | +                      | +                                   | +                 | +                       | +                           | +                     |
| Logan et al. (2008)[14]         | +                            | +                      | +                                   | +                 | +                       | +                           | +                     |
| Wu et al. (2009)[15]            | +                            | +                      | +                                   | -                 | -                       | ?                           | ?                     |
| Chu et al. (2011)[16]           | ?                            | -                      | ?                                   | -                 | +                       | +                           | -                     |
| Benamouzig et al. (2012)[17]    | +                            | +                      | +                                   | +                 | ?                       | +                           | ?                     |
| Bonelli et al. (2013)[18]       | +                            | ?                      | +                                   | ?                 | +                       | +                           | +                     |
| Ishikawa et al. (2014)[19]      | +                            | +                      | -                                   | +                 | +                       | +                           | +                     |
| Baron et al. (2015)[20]         | +                            | +                      | +                                   | +                 | +                       | +                           | +                     |
| Pommergaard et al. (2016)[21]   | +                            | +                      | +                                   | +                 | ?                       | +                           | +                     |

low risk (+); unclear risk (?); high risk (-)



### Justifications for other sources of bias:

- Hofstad et al. (1998): Control event rate is too high compared to large/good quality RCTs.
- Wu et al. (2009): 197 of 672 (29%) excluded from analysis as no-follow-up colonoscopy; follow-up of participants of 2 large prospective cohorts; no colonoscopy before randomization (baseline adenoma not resected).
- Chu et al. (2011): Used participants with history of colorectal cancer stage 0, I or II; control event rate is too high compared to large-high quality RCTs on subjects with history of only adenomas.
- Benamouzig et al. (2012): 87 of 272 (32%) excluded from analysis as no-follow-up colonoscopy at year 4. Possibility of lack of statistical power due to 32% exclusion rate. However, missing outcome data balanced in numbers across intervention groups, with similar reasons for missing data across groups; Reviewers think that, plausible bias unlikely to seriously alter the results. Moreover, this is the most update results from APACC trail and the only trail with a long duration of follow-up of 4 years; hence review authors agree to use the most updated results (Not 1-year results from APACC study – Benamouzig et al. (2003)).

**Figure S2 Summarized risk of bias of included randomized controlled trials**

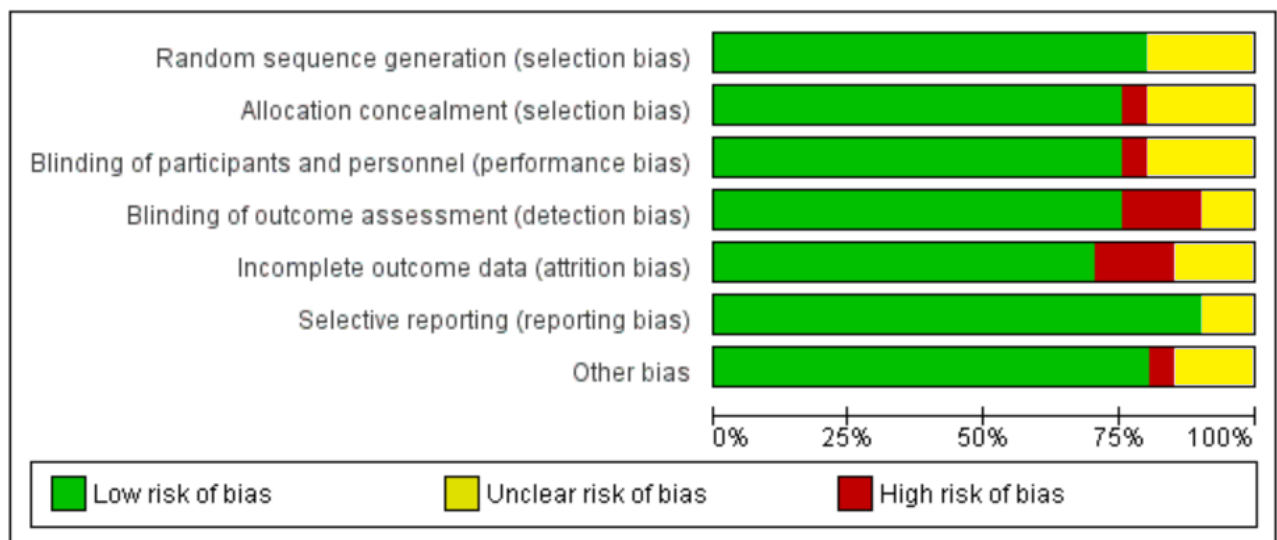

This report followed the recommended approach for assessing risk of bias in randomized controlled trials included in Cochrane reviews. This tool addresses specific bias domains including methods for generating the random sequence, allocation concealment, blinding of participants and investigators, blinding of outcome assessment, incompleteness of outcome data and selective outcome reporting. Each item is adjudicated within each study and the results are represented in a risk of bias table. The adjudication of the risk of bias is achieved by answering pre-specified questions about the methods reported by each study in relation to the risk domain, such that the conclusion is either low risk of bias, unclear risk of bias or high risk of bias.

## Network of comparisons

Figure S3 Network plot of all intervention comparisons for incidence of any adenomas

### i. All studies

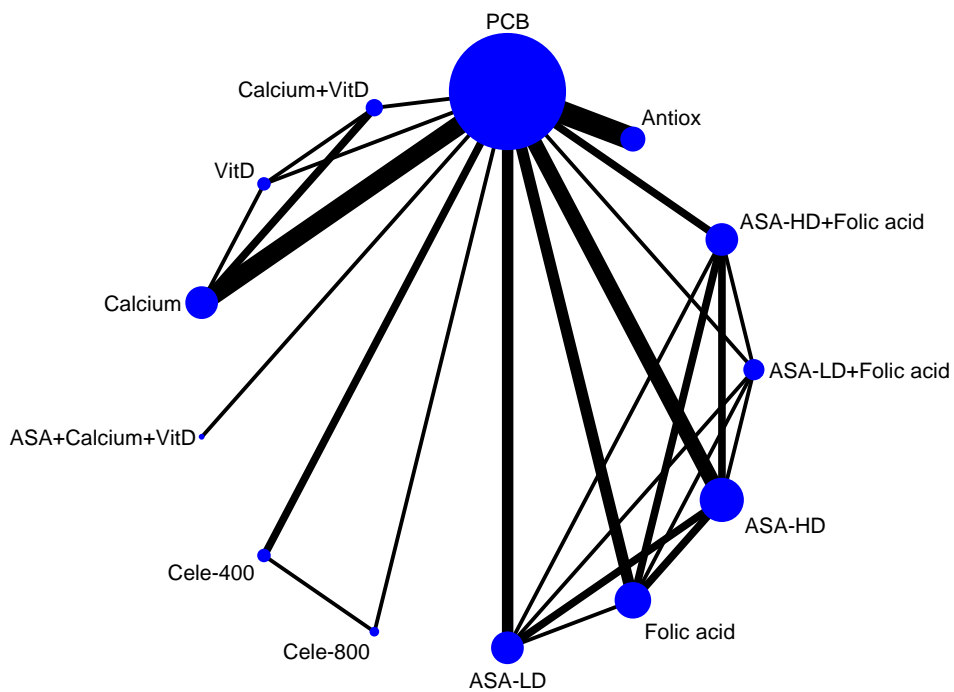

### ii. Low ROB studies including celecoxib

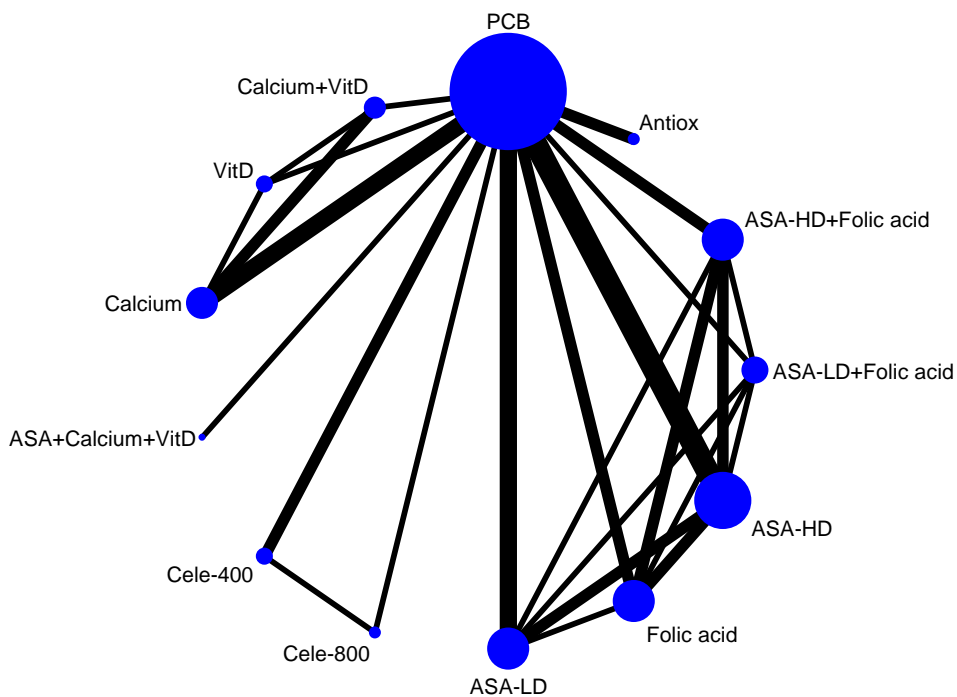

### iii. Low ROB + High ROB studies excluding celecoxib

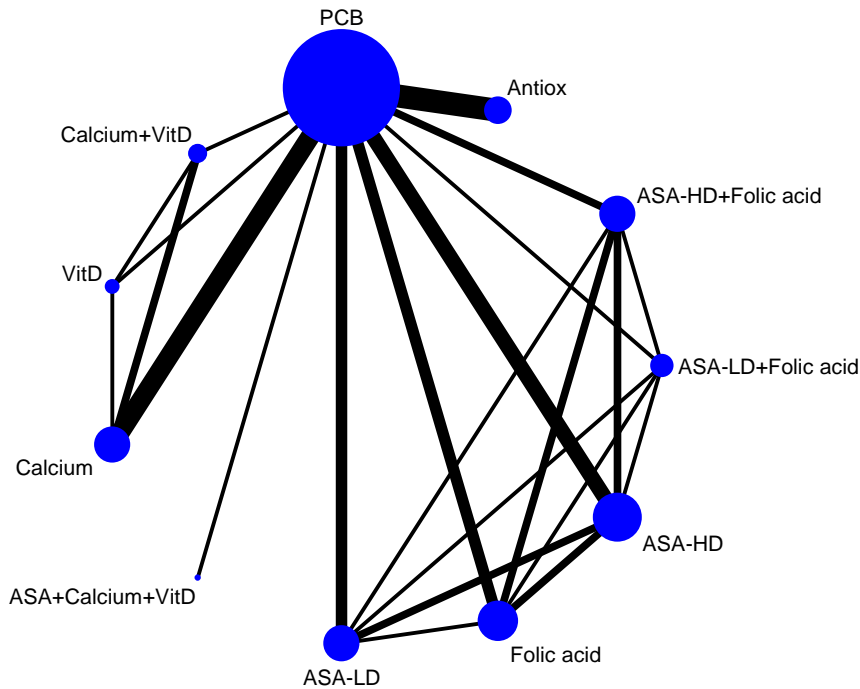

### iv. Low ROB studies excluding celecoxib

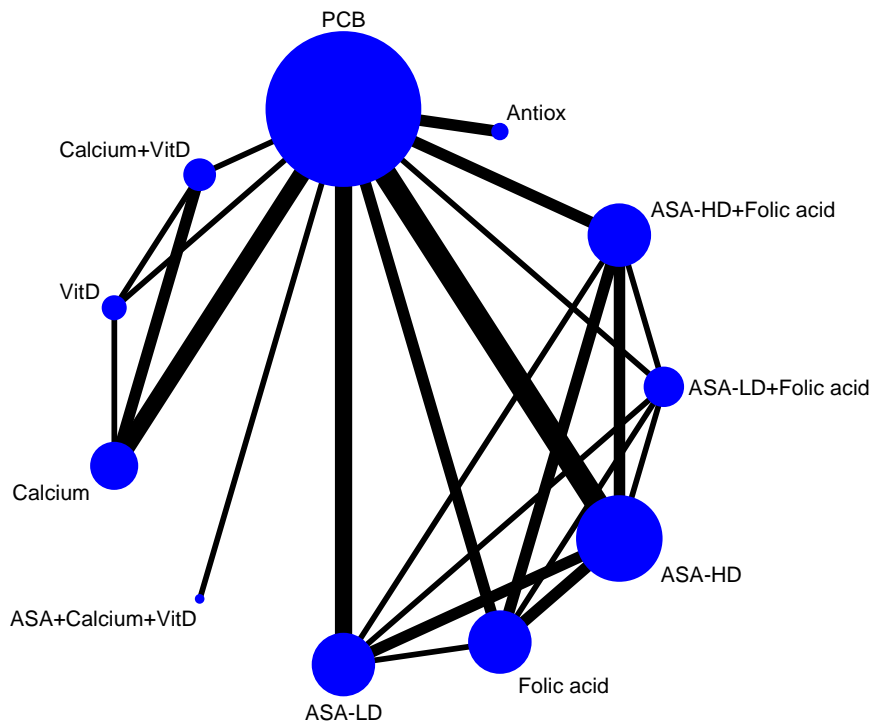

Size of the node corresponds to the number of individual studies that studied the treatment. The directly compared treatments are linked with a line, the thickness of which corresponds to the number of studies that assessed this comparison. Abbreviations: Antiox, antioxidants; ASA-HD, high-dose aspirin; ASA-LD, low-dose aspirin; Calcium, calcium supplements; Cele-400, celecoxib 400 mg/day; Cele-800, celecoxib 800 mg/day; PCB, placebo; VitD, vitamin D.

**Figure S4 Network plot of all intervention comparisons for incidence of advanced adenomas**

**i. All studies**

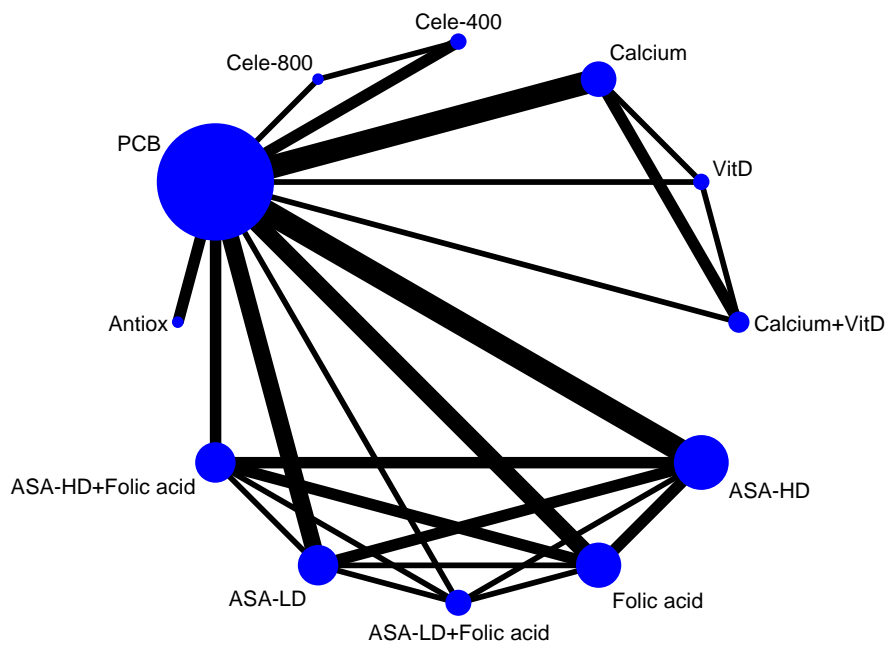

**ii. Low ROB studies including celecoxib**

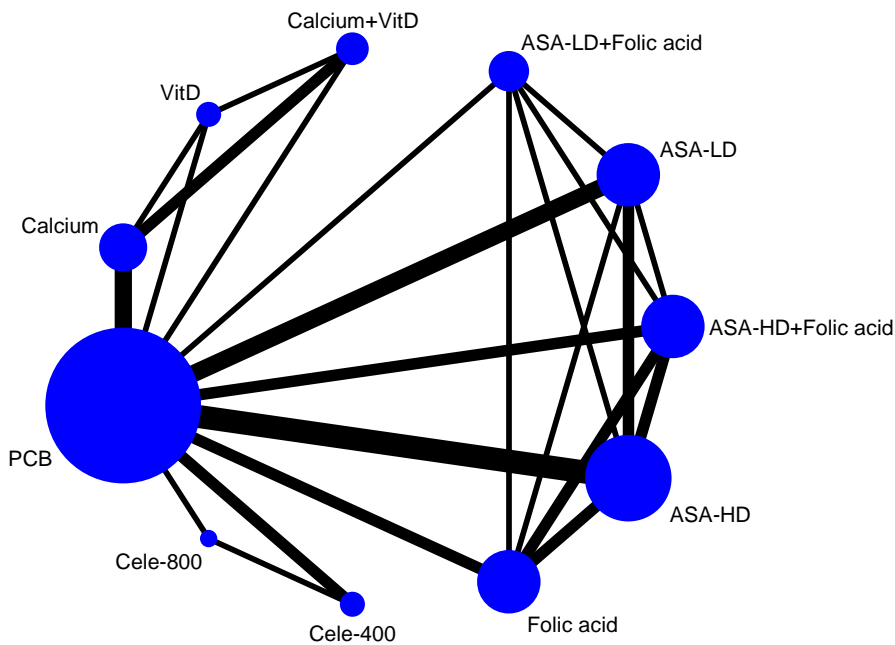

### iii. Low ROB + High ROB studies excluding celecoxib

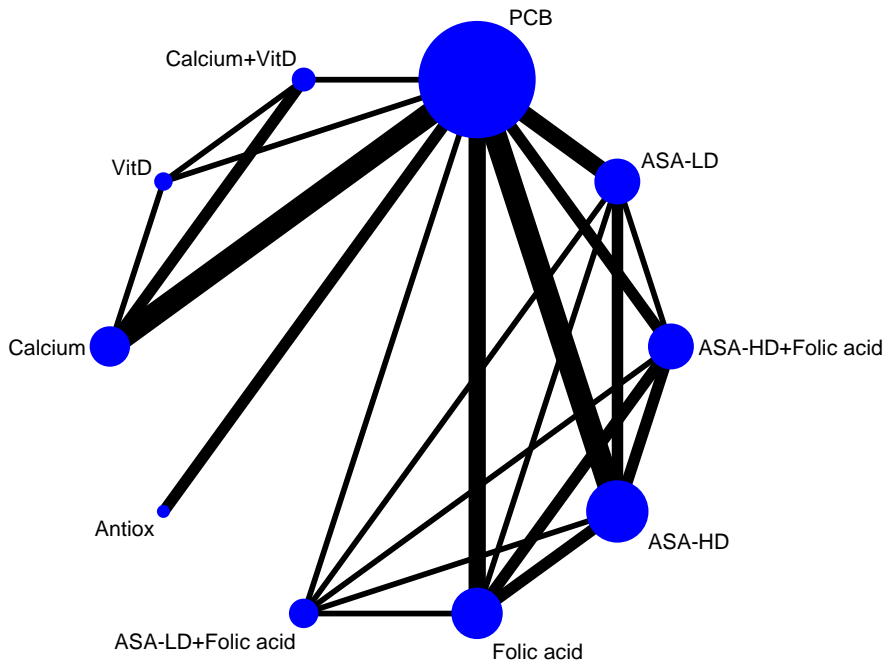

### iv. Low ROB studies excluding celecoxib

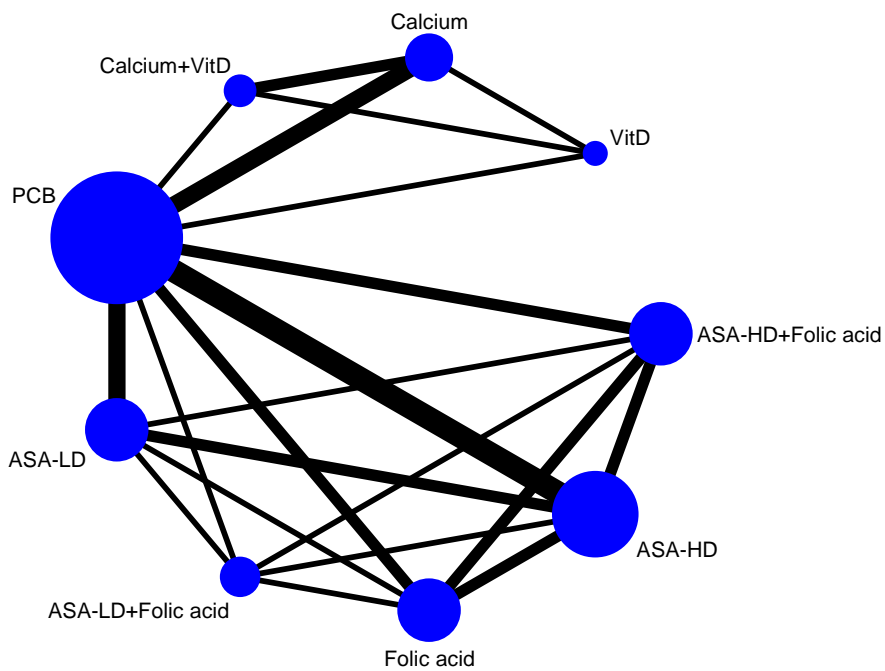

Size of the node corresponds to the number of individual studies that studied the treatment. The directly compared treatments are linked with a line, the thickness of which corresponds to the number of studies that assessed this comparison. Abbreviations: Antiox, antioxidants; ASA-HD, high-dose aspirin; ASA-LD, low-dose aspirin; Calcium, calcium supplements; Cele-400, celecoxib 400 mg/day; Cele-800, celecoxib 800 mg/day; PCB, placebo; VitD, vitamin D.

## Assessment of inconsistency in intervention triangular or quadratic loops for each outcome network

**Table S7 Assessment of global inconsistency in networks using the ‘design-by-treatment’ interaction model (all studies)**

| Network outcome                | Chi-square | P value for test of global inconsistency |
|--------------------------------|------------|------------------------------------------|
| Incidence of any adenomas      | 7.57       | 0.751                                    |
| Incidence of advanced adenomas | 7.34       | 0.771                                    |

### Difference between direct and indirect loops

We estimated inconsistency as the difference between direct and indirect estimates (called inconsistency factor, IF) and the corresponding 95% CI for each IF in each closed triangular or quadratic loop. Inconsistent loops are those that present inconsistency factors with 95% confidence intervals incompatible with zero.

**Table S8 Assessment of loop inconsistency in networks (all studies)**

| Loop                                  | IF [95% CI]      | P value | Loop heterogeneity $\tau^2$ |
|---------------------------------------|------------------|---------|-----------------------------|
| <b>Incidence of any adenomas</b>      |                  |         |                             |
| ASA(HD) – ASA(LD) – Folic             | 0.66 [0.08,1.24] | 0.027   | 0.000                       |
| ASA(HD) – ASA(LD) – ASA(LD)+Folic     | 0.61 [0.00,1.24] | 0.060   | 0.000                       |
| ASA(HD) – ASA(LD) – PCB               | 0.47 [0.00,1.01] | 0.088   | 0.022                       |
| ASA(HD)+Folic – Folic – PCB           | 0.29 [0.00,0.69] | 0.143   | 0.000                       |
| ASA(HD)+Folic – ASA(LD)+Folic – PCB   | 0.24 [0.00,0.74] | 0.353   | 0.000                       |
| ASA(LD)+Folic – Folic – PCB           | 0.21 [0.00,0.64] | 0.333   | 0.000                       |
| Calcium – Calcium+VitD – PCB          | 0.19 [0.00,0.43] | 0.126   | 0.000                       |
| Calcium – PCB – VitD                  | 0.19 [0.00,0.44] | 0.149   | 0.000                       |
| ASA(HD) – ASA(LD)+Folic – PCB         | 0.17 [0.00,0.60] | 0.450   | 0.000                       |
| ASA(LD) – ASA(LD)+Folic – PCB         | 0.16 [0.00,0.61] | 0.505   | 0.000                       |
| ASA(HD)+Folic – ASA(LD) – Folic       | 0.15 [0.00,0.62] | 0.519   | 0.000                       |
| ASA(HD)+Folic – ASA(LD)+Folic – Folic | 0.15 [0.00,0.64] | 0.533   | 0.000                       |
| ASA(HD) – ASA(LD)+Folic – Folic       | 0.15 [0.00,0.64] | 0.548   | 0.000                       |
| ASA(LD) – Folic – PCB                 | 0.13 [0.00,0.49] | 0.495   | 0.000                       |
| ASA(HD) – ASA(HD)+Folic – ASA(LD)     | 0.12 [0.00,0.61] | 0.618   | 0.000                       |
| ASA(HD) – Folic – PCB                 | 0.09 [0.00,0.82] | 0.801   | 0.072                       |
| ASA(HD)+Folic – ASA(LD) – PCB         | 0.07 [0.00,0.47] | 0.720   | 0.000                       |

| Loop                                    | IF [95% CI]      | P value | Loop heterogeneity tau <sup>2</sup> |
|-----------------------------------------|------------------|---------|-------------------------------------|
| <b>Incidence of any adenomas</b>        |                  |         |                                     |
| Celecoxib(400) - Celecoxib(800) - PCB   | 0.04 [0.00,0.25] | 0.710   | 0.000                               |
| Calcium - Calcium+VitD - VitD           | 0.01 [0.00,0.33] | 0.965   | 0.000                               |
| ASA(HD) - ASA(HD)+Folic - ASA(LD)+Folic | 0.01 [0.00,0.52] | 0.986   | 0.000                               |
| ASA(HD) - ASA(HD)+Folic - PCB           | 0.00 [0.00,0.86] | 0.995   | 0.096                               |
| ASA(HD) - ASA(HD)+Folic - Folic         | **               | **      | 0.000                               |
| ASA(HD)+Folic - ASA(LD) - ASA(LD)+Folic | **               | **      | 0.000                               |
| Calcium+VitD - PCB - VitD               | **               | **      | 0.000                               |
| ASA(LD) - ASA(LD)+Folic - Folic         | **               | **      | 0.000                               |
| <b>Incidence of advanced adenomas</b>   |                  |         |                                     |
| ASA(HD) - ASA(HD)+Folic - ASA(LD)       | 0.97 [0.00,2.44] | 0.198   | 0.000                               |
| ASA(HD)+Folic - ASA(LD) - PCB           | 0.95 [0.00,2.23] | 0.142   | 0.000                               |
| ASA(HD) - ASA(LD) - ASA(LD)+Folic       | 0.89 [0.00,2.51] | 0.287   | 0.000                               |
| ASA(HD)+Folic - ASA(LD)+Folic - PCB     | 0.81 [0.00,1.98] | 0.178   | 0.000                               |
| ASA(LD) - Folic - PCB                   | 0.80 [0.00,1.79] | 0.115   | 0.000                               |
| ASA(LD)+Folic - Folic - PCB             | 0.61 [0.00,1.68] | 0.271   | 0.000                               |
| ASA(HD) - ASA(LD)+Folic - PCB           | 0.58 [0.00,1.70] | 0.317   | 0.000                               |
| ASA(HD) - ASA(LD) - PCB                 | 0.57 [0.00,1.56] | 0.256   | 0.000                               |
| ASA(LD) - ASA(LD)+Folic - PCB           | 0.48 [0.00,1.95] | 0.527   | 0.000                               |
| Calcium - PCB - VitD                    | 0.36 [0.00,1.05] | 0.299   | 0.000                               |
| ASA(HD)+Folic - Folic - PCB             | 0.30 [0.00,1.17] | 0.495   | 0.000                               |
| Calcium - Calcium+VitD - PCB            | 0.29 [0.00,0.95] | 0.391   | 0.000                               |
| Calcium - Calcium+VitD - VitD           | 0.23 [0.00,1.07] | 0.590   | 0.000                               |
| ASA(HD)+Folic - ASA(LD) - Folic         | 0.23 [0.00,1.37] | 0.696   | 0.000                               |
| ASA(HD)+Folic - ASA(LD)+FA - Folic      | 0.23 [0.00,1.34] | 0.688   | 0.000                               |
| ASA(HD) - ASA(LD) - Folic               | 0.17 [0.00,1.24] | 0.750   | 0.000                               |
| ASA(HD) - ASA(HD)+Folic - ASA(LD)+Folic | 0.16 [0.00,1.32] | 0.792   | 0.000                               |
| Celecoxib(400) - Celecoxib(800) - PCB   | 0.11 [0.00,0.74] | 0.722   | 0.000                               |
| ASA(HD) - ASA(LD)+Folic - Folic         | 0.07 [0.00,1.17] | 0.900   | 0.000                               |
| ASA(HD) - Folic - PCB                   | 0.05 [0.00,0.95] | 0.907   | 0.000                               |
| ASA(HD) - ASA(HD)+Folic - PCB           | 0.05 [0.00,1.14] | 0.931   | 0.048                               |
| ASA(HD) - ASA(HD)+Folic - Folic         | **               | **      | 0.000                               |
| ASA(HD)+Folic - ASA(LD) - ASA(LD)+Folic | **               | **      | 0.000                               |
| ASA(LD) - ASA(LD)+Folic - Folic         | **               | **      | 0.000                               |
| Calcium+VitD - PCB - VitD               | **               | **      | 0.000                               |

**Note** \*\*Loop is formed only by multi-arm trial(s) - Consistent by definition.



**Table S9 Assessment of loop inconsistency in networks by node-splitting model (all studies)**

Tests of inconsistency by node-splitting method fitted the nod-splitting model of Dias et al. (Stat Med 2010;29:932-44.). The results reported the estimated direct and indirect treatment effects and their differences; the P-value for the difference is the test of consistency.

| Comparisons                      |                   | Direct |      | Indirect |      | Difference |      |         | tau <sup>2</sup> |
|----------------------------------|-------------------|--------|------|----------|------|------------|------|---------|------------------|
|                                  |                   | RR     | SE   | RR       | SE   | RR         | SE   | P value |                  |
| <b>Incidence of any adenomas</b> |                   |        |      |          |      |            |      |         |                  |
| ASA+Calcium+VitD                 | PCB               | -      | -    | -        | -    | -          | -    | -       | -                |
| ASA-HD                           | PCB               | 0.93   | 0.11 | 0.76     | 0.37 | 0.47       | 0.39 | 0.608   | 0.162            |
| ASA-HD+Folic acid                | PCB               | 0.96   | 0.15 | 0.74     | 0.30 | 0.48       | 0.34 | 0.441   | 0.158            |
| ASA-LD                           | PCB               | 0.84   | 0.11 | 0.39     | 0.28 | 0.68       | 0.29 | 0.008   | 0.095            |
| ASA-LD+Folic acid                | PCB               | 0.80   | 0.21 | 0.53     | 0.31 | 0.59       | 0.37 | 0.268   | 0.152            |
| ASA-HD                           | Folic acid        | 0.81   | 0.15 | 1.10     | 0.26 | 0.74       | 0.30 | 0.310   | 0.157            |
| ASA-HD+Folic acid                | Folic acid        | 0.83   | 0.14 | 1.43     | 0.48 | 0.58       | 0.50 | 0.279   | 0.151            |
| ASA-LD                           | Folic acid        | 0.75   | 0.21 | 0.68     | 0.23 | 1.10       | 0.31 | 0.745   | 0.170            |
| ASA-LD+Folic acid                | Folic acid        | 0.67   | 0.21 | 0.71     | 0.40 | 0.94       | 0.44 | 0.887   | 0.170            |
| ASA-HD+Folic acid                | ASA-HD            | 1.02   | 0.16 | 0.81     | 0.40 | 1.26       | 0.43 | 0.594   | 0.166            |
| ASA-LD+Folic acid                | ASA-LD            | 0.88   | 0.22 | 1.25     | 0.45 | 0.71       | 0.49 | 0.485   | 0.165            |
| ASA-LD+Folic acid                | ASA-HD+Folic acid | 0.75   | 0.21 | 0.94     | 0.47 | 0.80       | 0.51 | 0.653   | 0.165            |
| ASA-LD+Folic acid                | ASA-HD            | 0.77   | 0.22 | 0.78     | 0.37 | 0.98       | 0.42 | 0.969   | 0.169            |
| ASA-LD                           | ASA-HD            | 0.70   | 0.16 | 1.17     | 0.24 | 0.60       | 0.29 | 0.074   | 0.141            |
| ASA-LD                           | ASA-HD+Folic acid | 0.85   | 0.21 | 0.79     | 0.27 | 1.06       | 0.34 | 0.854   | 0.169            |
| Antiox                           | PCB               | -      | -    | -        | -    | -          | -    | -       | -                |
| Calcium                          | PCB               | 0.80   | 0.10 | 0.95     | 0.54 | 0.39       | 0.54 | 0.761   | 0.171            |

| Comparisons                           |                   | Direct |      | Indirect |      | Difference |      |         | tau <sup>2</sup> |
|---------------------------------------|-------------------|--------|------|----------|------|------------|------|---------|------------------|
|                                       |                   | RR     | SE   | RR       | SE   | RR         | SE   | P value |                  |
| Calcium+VitD                          | PCB               | 0.95   | 0.18 | 0.74     | 0.22 | 0.48       | 0.28 | 0.371   | 0.158            |
| Cele-400                              | PCB               | -      | -    | -        | -    | -          | -    | -       | -                |
| Cele-800                              | PCB               | 0.62   | 0.19 | 0.57     | 0.49 | 0.57       | 0.53 | 0.879   | 0.177            |
| Cele-800                              | Cele-400          | 0.87   | 0.19 | 0.94     | 0.49 | 0.92       | 0.53 | 0.879   | 0.177            |
| Folic acid                            | PCB               | 1.05   | 0.13 | 1.02     | 0.36 | 0.36       | 0.38 | 0.945   | 0.168            |
| VitD                                  | PCB               | 0.98   | 0.17 | 0.65     | 0.35 | 1.51       | 0.39 | 0.293   | 0.154            |
| Calcium                               | VitD              | 0.95   | 0.18 | 0.73     | 0.33 | 1.32       | 0.38 | 0.478   | 0.164            |
| Calcium+VitD                          | VitD              | 0.97   | 0.19 | 0.83     | 0.51 | 1.18       | 0.54 | 0.762   | 0.171            |
| Calcium                               | Calcium+VitD      | 0.99   | 0.13 | 0.65     | 0.37 | 1.52       | 0.39 | 0.293   | 0.154            |
| <b>Incidence of advanced adenomas</b> |                   |        |      |          |      |            |      |         |                  |
| ASA-HD                                | PCB               | 0.87   | 0.18 | 0.48     | 0.71 | 1.82       | 0.73 | 0.410   | 0.000            |
| ASA-HD+Folic acid                     | PCB               | 0.81   | 0.21 | 0.78     | 0.55 | 1.05       | 0.58 | 0.934   | 0.000            |
| ASA-LD                                | PCB               | 0.85   | 0.31 | 0.23     | 0.54 | 3.70       | 0.59 | 0.027   | 0.000            |
| ASA-LD+Folic acid                     | PCB               | 0.76   | 0.39 | 0.26     | 0.54 | 2.94       | 0.64 | 0.091   | 0.000            |
| ASA-HD                                | Folic acid        | 0.68   | 0.19 | 0.81     | 0.50 | 0.83       | 0.53 | 0.730   | 0.000            |
| ASA-HD+Folic acid                     | Folic acid        | 0.65   | 0.19 | 1.19     | 0.75 | 0.54       | 0.76 | 0.421   | 0.000            |
| ASA-LD                                | Folic acid        | 0.41   | 0.34 | 0.74     | 0.40 | 0.56       | 0.48 | 0.219   | 0.000            |
| ASA-LD+Folic acid                     | Folic acid        | 0.41   | 0.34 | 0.60     | 0.56 | 0.68       | 0.56 | 0.486   | 0.026            |
| ASA-HD+Folic acid                     | ASA-HD            | 0.94   | 0.21 | 1.25     | 0.80 | 0.75       | 0.83 | 0.732   | 0.000            |
| ASA-LD+Folic acid                     | ASA-LD            | 1.09   | 0.42 | 0.21     | 1.03 | 5.29       | 1.12 | 0.136   | 0.000            |
| ASA-LD+Folic acid                     | ASA-HD+Folic acid | 0.57   | 0.36 | 1.26     | 0.65 | 0.45       | 0.69 | 0.249   | 0.000            |
| ASA-LD+Folic acid                     | ASA-HD            | 0.57   | 0.37 | 0.88     | 0.58 | 0.65       | 0.64 | 0.498   | 0.000            |

| Comparisons  |                   | Direct |      | Indirect |      | Difference |      |         | tau <sup>2</sup> |
|--------------|-------------------|--------|------|----------|------|------------|------|---------|------------------|
|              |                   | RR     | SE   | RR       | SE   | RR         | SE   | P value |                  |
| ASA-LD       | ASA-HD            | 0.71   | 0.32 | 0.93     | 0.54 | 0.76       | 0.60 | 0.653   | 0.000            |
| ASA-LD       | ASA-HD+Folic acid | 0.55   | 0.37 | 1.43     | 0.46 | 0.38       | 0.57 | 0.089   | 0.000            |
| Antiox       | PCB               | -      | -    | -        | -    | -          | -    | -       | -                |
| Calcium      | PCB               | 1.00   | 0.14 | 0.76     | 0.74 | 1.32       | 0.75 | 0.707   | 0.028            |
| Calcium+VitD | PCB               | 1.03   | 0.22 | 0.79     | 0.34 | 1.32       | 0.41 | 0.503   | 0.000            |
| Cele-400     | PCB               | -      | -    | -        | -    | -          | -    | -       | -                |
| Cele-800     | PCB               | 0.37   | 0.20 | 0.46     | 0.55 | 0.79       | 0.56 | 0.682   | 0.099            |
| Cele-800     | Cele-400          | 0.81   | 0.22 | 0.64     | 0.52 | 1.26       | 0.56 | 0.682   | 0.099            |
| Folic acid   | PCB               | 1.18   | 0.16 | 2.04     | 0.74 | 0.58       | 0.77 | 0.480   | 0.000            |
| VitD         | PCB               | 1.19   | 0.22 | 0.61     | 0.50 | 1.93       | 0.55 | 0.234   | 0.000            |
| Calcium      | VitD              | 1.04   | 0.20 | 0.55     | 0.45 | 1.89       | 0.49 | 0.192   | 0.000            |
| Calcium+VitD | VitD              | 0.88   | 0.22 | 1.16     | 0.71 | 0.76       | 0.75 | 0.707   | 0.028            |
| Calcium      | Calcium+VitD      | 1.11   | 0.17 | 0.57     | 0.53 | 1.92       | 0.55 | 0.234   | 0.000            |

## Results of meta-analyses of direct comparisons

**Table S10 Results of pairwise meta-analyses**

| Comparisons                      |                   | No. of studies (all RCTs) | Pairwise meta-analysis relative risk [95% CI] | Heterogeneity, I <sup>2</sup> | No. of studies (RCTs withlow ROB including celecoxib) | Pairwise meta-analysis relative risk [95% CI] | Heterogeneity, I <sup>2</sup> |
|----------------------------------|-------------------|---------------------------|-----------------------------------------------|-------------------------------|-------------------------------------------------------|-----------------------------------------------|-------------------------------|
| <b>Incidence of any adenomas</b> |                   |                           |                                               |                               |                                                       |                                               |                               |
| ASA+Calcium+VitD                 | PCB               | 1                         | 0.94 [0.68, 1.29]                             | NA                            | 1                                                     | 0.94 [0.68, 1.29]                             | NA                            |
| ASA-HD                           | PCB               | 4                         | 0.93 [0.67, 1.29]                             | 76.7%                         | 4                                                     | 0.93 [0.67, 1.29]                             | 76.7%                         |
| ASA-HD+Folic acid                | PCB               | 2                         | 0.97 [0.77, 1.22]                             | 23.7%                         | 2                                                     | 0.97 [0.77, 1.22]                             | 23.7%                         |
| ASA-LD                           | PCB               | 3                         | <b>0.83 [0.70, 0.99]</b>                      | 0.0%                          | 3                                                     | <b>0.83 [0.70, 0.99]</b>                      | 0.0%                          |
| ASA-LD+Folic acid                | PCB               | 1                         | 0.80 [0.61, 1.05]                             | NA                            | 1                                                     | 0.80 [0.61, 1.05]                             | NA                            |
| ASA-HD                           | Folic acid        | 2                         | <b>0.83 [0.68, 0.99]</b>                      | 0.0%                          | 2                                                     | <b>0.83 [0.68, 0.99]</b>                      | 0.0%                          |
| ASA-HD+Folic acid                | Folic acid        | 2                         | 0.85 [0.70, 1.01]                             | 0.0%                          | 2                                                     | 0.85 [0.70, 1.01]                             | 0.0%                          |
| ASA-LD                           | Folic acid        | 1                         | <b>0.76 [0.60, 0.96]</b>                      | NA                            | 1                                                     | <b>0.76 [0.60, 0.96]</b>                      | NA                            |
| ASA-LD+Folic acid                | Folic acid        | 1                         | <b>0.67 [0.52, 0.86]</b>                      | NA                            | 1                                                     | <b>0.67 [0.52, 0.86]</b>                      | NA                            |
| ASA-HD+Folic acid                | ASA-HD            | 2                         | 1.02 [0.84, 1.25]                             | 0.0%                          | 2                                                     | 1.02 [0.84, 1.25]                             | 0.0%                          |
| ASA-LD+Folic acid                | ASA-LD            | 1                         | 0.88 [0.67, 1.17]                             | NA                            | 1                                                     | 0.88 [0.67, 1.17]                             | NA                            |
| ASA-LD+Folic acid                | ASA-HD+Folic acid | 1                         | <b>0.75 [0.58, 0.98]</b>                      | NA                            | 1                                                     | <b>0.75 [0.58, 0.98]</b>                      | NA                            |
| ASA-LD+Folic acid                | ASA-HD            | 1                         | 0.77 [0.59, 1.01]                             | NA                            | 1                                                     | 0.77 [0.59, 1.01]                             | NA                            |
| ASA-LD                           | ASA-HD            | 2                         | 0.67 [0.37, 1.21]                             | 77.9%                         | 2                                                     | 0.67 [0.37, 1.21]                             | 77.9%                         |
| ASA-LD                           | ASA-HD+Folic acid | 1                         | 0.85 [0.66, 1.09]                             | NA                            | 1                                                     | 0.85 [0.66, 1.09]                             | NA                            |

| Comparisons                           |              | No. of studies (all RCTs) | Pairwise meta-analysis relative risk [95% CI] | Heterogeneity, I <sup>2</sup> | No. of studies (RCTs with low ROB including celecoxib) | Pairwise meta-analysis relative risk [95% CI] | Heterogeneity, I <sup>2</sup> |
|---------------------------------------|--------------|---------------------------|-----------------------------------------------|-------------------------------|--------------------------------------------------------|-----------------------------------------------|-------------------------------|
| Antiox                                | PCB          | 6                         | 0.77 [0.54, 1.11]                             | 77.0%                         | 2                                                      | 1.09 [0.91, 1.32]                             | 2.4%                          |
| Calcium                               | PCB          | 5                         | <b>0.83 [0.75, 0.93]</b>                      | 8.5%                          | 3                                                      | <b>0.88 [0.79, 0.99]</b>                      | 0.0%                          |
| Calcium-VitD                          | PCB          | 1                         | 0.95 [0.82, 1.10]                             | NA                            | 1                                                      | 0.95 [0.82, 1.10]                             | NA                            |
| Cele-400                              | PCB          | 2                         | <b>0.70 [0.64, 0.76]</b>                      | 0.0%                          | 2                                                      | <b>0.70 [0.64, 0.76]</b>                      | 0.0%                          |
| Cele-800                              | PCB          | 1                         | <b>0.62 [0.55, 0.69]</b>                      | NA                            | 1                                                      | <b>0.62 [0.55, 0.69]</b>                      | NA                            |
| Cele-800                              | Cele-400     | 1                         | <b>0.87 [0.76, 0.99]</b>                      | NA                            | 1                                                      | <b>0.87 [0.76, 0.99]</b>                      | NA                            |
| Folic acid                            | PCB          | 3                         | 1.06 [0.87, 1.28]                             | 35.0%                         | 2                                                      | 1.16 [0.97, 1.40]                             | 0.0%                          |
| VitD                                  | PCB          | 1                         | 0.98 [0.84, 1.13]                             | NA                            | 1                                                      | 0.98 [0.84, 1.13]                             | NA                            |
| Calcium                               | VitD         | 1                         | 0.95 [0.82, 1.11]                             | NA                            | 1                                                      | 0.95 [0.82, 1.11]                             | NA                            |
| Calcium-VitD                          | VitD         | 1                         | 0.97 [0.83, 1.14]                             | NA                            | 1                                                      | 0.97 [0.83, 1.14]                             | NA                            |
| Calcium                               | Calcium-VitD | 2                         | 0.98 [0.86, 1.12]                             | 0.0%                          | 2                                                      | 0.98 [0.86, 1.12]                             | 0.0%                          |
| <b>Incidence of advanced adenomas</b> |              |                           |                                               |                               |                                                        |                                               |                               |
| ASA-HD                                | PCB          | 4                         | 0.88 [0.61, 1.25]                             | 0.0%                          | 4                                                      | 0.88 [0.61, 1.25]                             | 0.0%                          |
| ASA-HD+Folic acid                     | PCB          | 2                         | 0.87 [0.40, 1.92]                             | 71.0%                         | 2                                                      | 0.87 [0.40, 1.92]                             | 71.0%                         |
| ASA-LD                                | PCB          | 3                         | 0.84 [0.46, 1.55]                             | 0.0%                          | 3                                                      | 0.84 [0.46, 1.55]                             | 0.0%                          |
| ASA-LD+Folic acid                     | PCB          | 1                         | 0.76 [0.35, 1.62]                             | NA                            | 1                                                      | 0.76 [0.35, 1.62]                             | NA                            |
| ASA-HD                                | Folic acid   | 2                         | <b>0.68 [0.47, 0.99]</b>                      | 0.0%                          | 2                                                      | <b>0.68 [0.47, 0.99]</b>                      | 0.0%                          |
| ASA-HD+Folic acid                     | Folic acid   | 2                         | <b>0.64 [0.44, 0.93]</b>                      | 0.0%                          | 2                                                      | <b>0.64 [0.44, 0.93]</b>                      | 0.0%                          |
| ASA-LD                                | Folic acid   | 1                         | <b>0.37 [0.19, 0.75]</b>                      | NA                            | 1                                                      | <b>0.37 [0.19, 0.75]</b>                      | NA                            |

| Comparisons       |                   | No. of studies (all RCTs) | Pairwise meta-analysis relative risk [95% CI] | Heterogeneity, I <sup>2</sup> | No. of studies (RCTs with low ROB including celecoxib) | Pairwise meta-analysis relative risk [95% CI] | Heterogeneity, I <sup>2</sup> |
|-------------------|-------------------|---------------------------|-----------------------------------------------|-------------------------------|--------------------------------------------------------|-----------------------------------------------|-------------------------------|
| ASA-LD+Folic acid | Folic acid        | 1                         | <b>0.41 [0.21, 0.79]</b>                      | NA                            | 1                                                      | <b>0.41 [0.21, 0.79]</b>                      | NA                            |
| ASA-HD+Folic acid | ASA-HD            | 2                         | 0.93 [0.61, 1.42]                             | 0.0%                          | 2                                                      | 0.93 [0.61, 1.42]                             | 0.0%                          |
| ASA-LD+Folic acid | ASA-LD            | 1                         | 1.09 [0.47, 2.49]                             | NA                            | 1                                                      | 1.09 [0.47, 2.49]                             | NA                            |
| ASA-LD+Folic acid | ASA-HD+Folic acid | 1                         | 0.57 [0.28, 1.16]                             | NA                            | 1                                                      | 0.57 [0.28, 1.16]                             | NA                            |
| ASA-LD+Folic acid | ASA-HD            | 1                         | 0.58 [0.28, 1.18]                             | NA                            | 1                                                      | 0.58 [0.28, 1.18]                             | NA                            |
| ASA-LD            | ASA-HD            | 2                         | 0.72 [0.32, 1.65]                             | 33.6%                         | 2                                                      | 0.72 [0.32, 1.65]                             | 33.6%                         |
| ASA-LD            | ASA-HD+Folic acid | 1                         | 0.52 [0.25, 1.09]                             | NA                            | 1                                                      | 0.52 [0.25, 1.09]                             | NA                            |
| Antiox            | PCB               | 2                         | 0.45 [0.16, 1.23]                             | 25.8%                         | -                                                      | -                                             | -                             |
| Calcium           | PCB               | 4                         | 1.01 [0.74, 1.38]                             | 17.5%                         | 3                                                      | 1.02 [0.67, 1.55]                             | 44.9%                         |
| Calcium-VitD      | PCB               | 1                         | 1.04 [0.67, 1.61]                             | NA                            | 1                                                      | 1.04 [0.67, 1.61]                             | NA                            |
| Cele-400          | PCB               | 2                         | <b>0.48 [0.38, 0.60]</b>                      | 0.0%                          | 2                                                      | <b>0.48 [0.38, 0.60]</b>                      | 0.0%                          |
| Cele-800          | PCB               | 1                         | <b>0.37 [0.26, 0.51]</b>                      | NA                            | 1                                                      | <b>0.37 [0.26, 0.51]</b>                      | NA                            |
| Cele-800          | Cele-400          | 1                         | 0.81 [0.55, 1.20]                             | NA                            | 1                                                      | 0.81 [0.55, 1.20]                             | NA                            |
| Folic acid        | PCB               | 3                         | 1.21 [0.82, 1.78]                             | 28.6%                         | 2                                                      | 1.34 [0.77, 2.36]                             | 54.9%                         |
| VitD              | PCB               | 1                         | 1.19 [0.78, 1.82]                             | NA                            | 1                                                      | 1.19 [0.78, 1.82]                             | NA                            |
| Calcium           | VitD              | 1                         | 1.04 [0.70, 1.55]                             | NA                            | 1                                                      | 1.04 [0.70, 1.55]                             | NA                            |
| Calcium-VitD      | VitD              | 1                         | 0.87 [0.58, 1.33]                             | NA                            | 1                                                      | 0.87 [0.58, 1.33]                             | NA                            |
| Calcium           | Calcium-VitD      | 2                         | 1.11 [0.79, 1.56]                             | 0.0%                          | 2                                                      | 1.11 [0.79, 1.56]                             | 0.0%                          |

Abbreviations: Antiox, antioxidants; ASA-HD, high-dose aspirin; ASA-LD, low-dose aspirin; Calcium, calcium supplements; Cele-400, celecoxib 400 mg/day; Cele-800, celecoxib 800 mg/day; PCB, placebo; VitD, vitamin D.

## Results of network meta-analysis

**Table S11 Results of network meta-analysis for incidence of any adenomas**

| Intervention                                  | All studies                     |           |
|-----------------------------------------------|---------------------------------|-----------|
|                                               | RR [95% CI]                     | SUCRArank |
| Cele-800                                      | <b><u>0.61 [0.45, 0.83]</u></b> | 1         |
| Cele-400                                      | <b><u>0.70 [0.55, 0.87]</u></b> | 2         |
| ASA-LD+Folic acid                             | 0.71 [0.50, 1.00]               | 3         |
| ASA-LD                                        | <b><u>0.75 [0.59, 0.96]</u></b> | 4         |
| Calcium                                       | <b><u>0.81 [0.68, 0.97]</u></b> | 5         |
| Antiox                                        | 0.86 [0.68, 1.07]               | 6         |
| Calcium+VitD                                  | 0.86 [0.66, 1.12]               | 7         |
| VitD                                          | 0.90 [0.67, 1.22]               | 8         |
| ASA-HD+Folic acid                             | 0.91 [0.70, 1.19]               | 9         |
| ASA+Calcium+VitD                              | 0.94 [0.60, 1.45]               | 10        |
| ASA-HD                                        | 0.92 [0.75, 1.13]               | 11        |
| PCB                                           | reference                       | 12        |
| Folic acid                                    | 1.05 [0.84, 1.31]               | 13        |
| Overall inconsistency<br>Chi-square (p value) | 7.57 (0.751)                    |           |
| <b>Number of studies</b>                      | <b>21</b>                       |           |



**Figure S5 Network estimated relative risk (95% confidence interval) of chemopreventive agents for incidence of any adenomas (all studies)**

|                         |                             |                          |                             |                             |                     |                             |                     |                             |                             |                     |                     |            |  |  |
|-------------------------|-----------------------------|--------------------------|-----------------------------|-----------------------------|---------------------|-----------------------------|---------------------|-----------------------------|-----------------------------|---------------------|---------------------|------------|--|--|
| <b>ASA+Calcium+VitD</b> |                             |                          |                             |                             |                     |                             |                     |                             |                             |                     |                     |            |  |  |
| 1.02<br>(0.62,1.66)     | <b>ASA-HD</b>               |                          |                             |                             |                     |                             |                     |                             |                             |                     |                     |            |  |  |
| 1.02<br>(0.61,1.71)     | 1.01<br>(0.76,1.32)         | <b>ASA-HD+Folic acid</b> |                             |                             |                     |                             |                     |                             |                             |                     |                     |            |  |  |
| 1.24<br>(0.75,2.05)     | 1.22<br>(0.93,1.60)         | 1.21<br>(0.89,1.65)      | <b>ASA-LD</b>               |                             |                     |                             |                     |                             |                             |                     |                     |            |  |  |
| 1.32<br>(0.75,2.31)     | 1.29<br>(0.91,1.85)         | 1.29<br>(0.89,1.87)      | 1.06<br>(0.73,1.55)         | <b>ASA-LD+Folic acid</b>    |                     |                             |                     |                             |                             |                     |                     |            |  |  |
| 1.09<br>(0.67,1.79)     | 1.07<br>(0.79,1.46)         | 1.07<br>(0.76,1.50)      | 0.88<br>(0.64,1.22)         | 0.83<br>(0.55,1.25)         | <b>Antiox</b>       |                             |                     |                             |                             |                     |                     |            |  |  |
| 1.15<br>(0.72,1.86)     | 1.13<br>(0.86,1.49)         | 1.13<br>(0.82,1.55)      | 0.93<br>(0.69,1.26)         | 0.88<br>(0.59,1.29)         | 1.06<br>(0.80,1.40) | <b>Calcium</b>              |                     |                             |                             |                     |                     |            |  |  |
| 1.09<br>(0.65,1.82)     | 1.07<br>(0.76,1.50)         | 1.06<br>(0.73,1.54)      | 0.88<br>(0.61,1.25)         | 0.82<br>(0.53,1.28)         | 1.00<br>(0.71,1.40) | 0.94<br>(0.74,1.20)         | <b>Calcium+VitD</b> |                             |                             |                     |                     |            |  |  |
| 1.34<br>(0.82,2.21)     | 1.32<br>(0.97,1.80)         | 1.31<br>(0.93,1.86)      | 1.08<br>(0.78,1.51)         | 1.02<br>(0.67,1.54)         | 1.23<br>(0.89,1.69) | 1.16<br>(0.87,1.55)         | 1.24<br>(0.87,1.75) | <b>Cele-400</b>             |                             |                     |                     |            |  |  |
| 1.53<br>(0.90,2.62)     | <b>1.50<br/>(1.04,2.18)</b> | 1.49<br>(1.00,2.23)      | 1.24<br>(0.84,1.82)         | 1.16<br>(0.73,1.84)         | 1.40<br>(0.96,2.04) | 1.33<br>(0.93,1.89)         | 1.41<br>(0.94,2.11) | 1.14<br>(0.84,1.55)         | <b>Cele-800</b>             |                     |                     |            |  |  |
| 0.89<br>(0.54,1.46)     | 0.87<br>(0.68,1.12)         | 0.87<br>(0.66,1.14)      | <b>0.72<br/>(0.54,0.96)</b> | <b>0.68<br/>(0.47,0.97)</b> | 0.82<br>(0.60,1.11) | 0.77<br>(0.58,1.02)         | 0.82<br>(0.58,1.15) | <b>0.66<br/>(0.48,0.91)</b> | <b>0.58<br/>(0.40,0.85)</b> | <b>Folic acid</b>   |                     |            |  |  |
| 1.04<br>(0.61,1.77)     | 1.02<br>(0.70,1.47)         | 1.01<br>(0.68,1.51)      | 0.84<br>(0.57,1.23)         | 0.79<br>(0.50,1.25)         | 0.95<br>(0.65,1.38) | 0.90<br>(0.67,1.21)         | 0.95<br>(0.69,1.31) | 0.77<br>(0.53,1.13)         | 0.68<br>(0.44,1.04)         | 1.16<br>(0.80,1.69) | <b>VitD</b>         |            |  |  |
| 0.94<br>(0.60,1.45)     | 0.92<br>(0.75,1.13)         | 0.91<br>(0.70,1.19)      | <b>0.75<br/>(0.59,0.96)</b> | 0.71<br>(0.50,1.00)         | 0.86<br>(0.68,1.07) | <b>0.81<br/>(0.68,0.97)</b> | 0.86<br>(0.66,1.12) | <b>0.70<br/>(0.55,0.87)</b> | <b>0.61<br/>(0.45,0.83)</b> | 1.05<br>(0.84,1.31) | 0.90<br>(0.67,1.22) | <b>PCB</b> |  |  |

**Abbreviations:** Antiox, antioxidants; ASA-HD, high-dose aspirin; ASA-LD, low-dose aspirin; Calcium, calcium supplements; Cele-400, celecoxib 400 mg/day; Cele-800, celecoxib 800 mg/day; PCB, placebo; VitD, vitamin D.

\*Comparison between treatments should be read from column to row for each outcome (row treatment is reference).

**Figure S6 SUCRA ranking curve for incidence of any adenomas (all studies)**

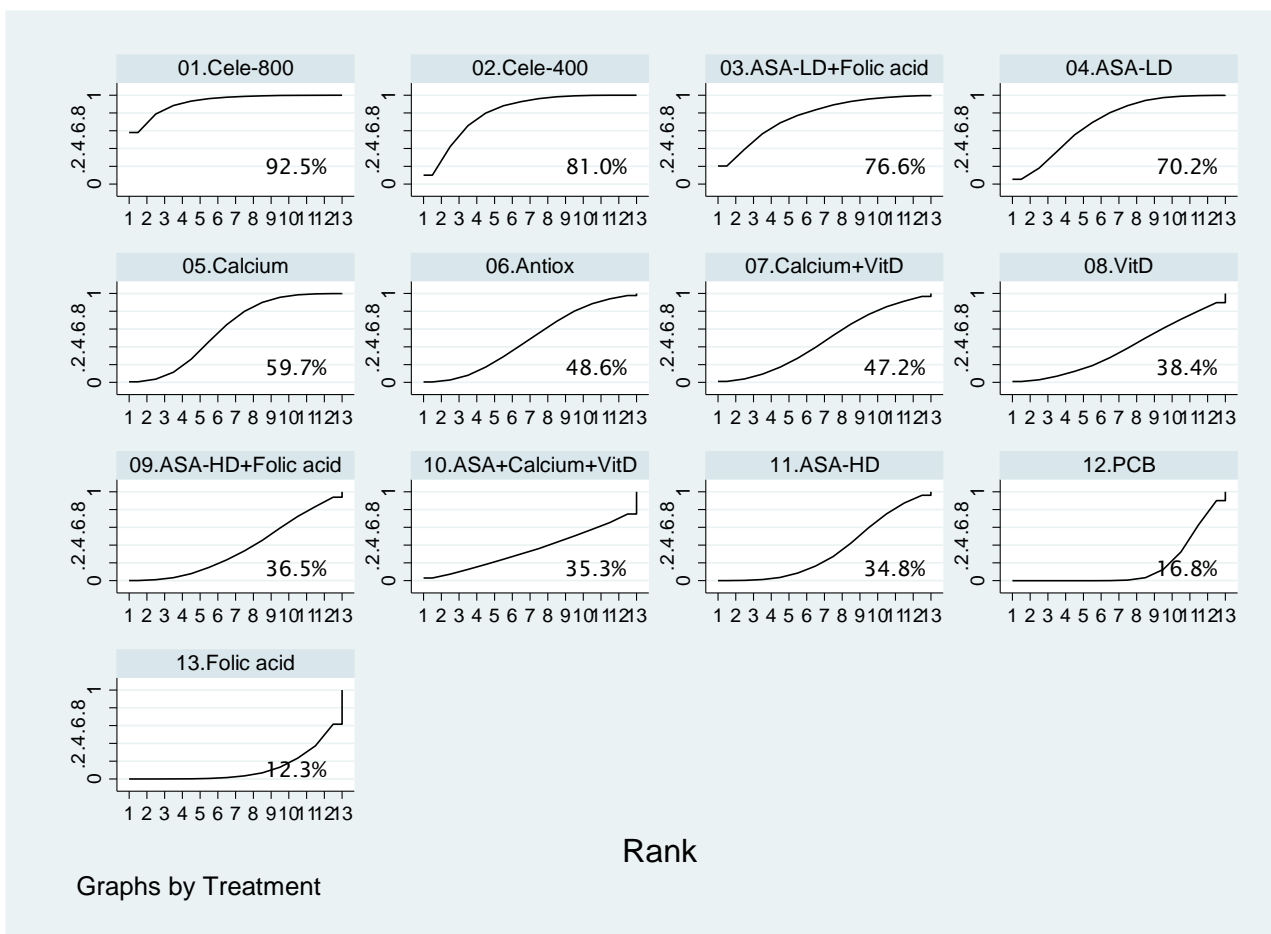

**Abbreviations:** Antiox, antioxidants; ASA-HD, high-dose aspirin; ASA-LD, low-dose aspirin; Calcium, calcium supplements; Cele-400, celecoxib 400 mg/day; Cele-800, celecoxib 800 mg/day; PCB, placebo; VitD, vitamin D.

**Table S12 Results of network meta-analysis for incidence of advanced adenomas**

| Intervention                                 | All studies              |           |
|----------------------------------------------|--------------------------|-----------|
|                                              | RR [95% CI]              | SUCRArank |
| Cele-800                                     | <b>0.37 [0.27, 0.52]</b> | 1         |
| Cele-400                                     | <b>0.48 [0.38, 0.60]</b> | 2         |
| Antiox                                       | <b>0.51 [0.27, 0.97]</b> | 3         |
| ASA-LD+Folic acid                            | 0.54 [0.28, 1.02]        | 4         |
| ASA-LD                                       | 0.63 [0.37, 1.09]        | 5         |
| ASA-HD+Folic acid                            | 0.81 [0.55, 1.19]        | 6         |
| ASA-HD                                       | 0.84 [0.59, 1.19]        | 7         |
| Calcium+VitD                                 | 0.95 [0.66, 1.37]        | 8         |
| Calcium                                      | 0.99 [0.76, 1.30]        | 9         |
| PCB                                          | reference                | 10        |
| VitD                                         | 1.06 [0.72, 1.56]        | 11        |
| Folic acid                                   | 1.22 [0.89, 1.65]        | 12        |
| Overall inconsistency<br>Chi-square(p value) | 7.34 (0.771)             |           |
| <b>Number of studies</b>                     | <b>15</b>                |           |

**Figure S7 Network estimated relative risk (95% confidence interval) of chemopreventive agents for incidence of advanced adenomas (all studies)**

|                             |                               |                             |                               |                             |                             |                             |                             |                             |                     |                     |            |  |
|-----------------------------|-------------------------------|-----------------------------|-------------------------------|-----------------------------|-----------------------------|-----------------------------|-----------------------------|-----------------------------|---------------------|---------------------|------------|--|
| <b>ASA-HD</b>               |                               |                             |                               |                             |                             |                             |                             |                             |                     |                     |            |  |
| 1.04<br>(0.69,1.56)         | <b>ASA-HD+<br/>Folic acid</b> |                             |                               |                             |                             |                             |                             |                             |                     |                     |            |  |
| 1.33<br>(0.76,2.32)         | 1.27<br>(0.71,2.30)           | <b>ASA-LD</b>               |                               |                             |                             |                             |                             |                             |                     |                     |            |  |
| 1.57<br>(0.82,3.00)         | 1.51<br>(0.78,2.91)           | 1.18<br>(0.55,2.53)         | <b>ASA-LD+<br/>Folic acid</b> |                             |                             |                             |                             |                             |                     |                     |            |  |
| 1.64<br>(0.79,3.41)         | 1.58<br>(0.75,3.34)           | 1.24<br>(0.53,2.88)         | 1.05<br>(0.42,2.60)           | <b>Antiox</b>               |                             |                             |                             |                             |                     |                     |            |  |
| 0.84<br>(0.54,1.31)         | 0.81<br>(0.51,1.30)           | 0.64<br>(0.35,1.17)         | 0.54<br>(0.27,1.08)           | 0.51<br>(0.26,1.03)         | <b>Calcium</b>              |                             |                             |                             |                     |                     |            |  |
| 0.88<br>(0.53,1.46)         | 0.85<br>(0.50,1.44)           | 0.67<br>(0.35,1.28)         | 0.56<br>(0.27,1.18)           | 0.54<br>(0.26,1.12)         | 1.04<br>(0.75,1.45)         | <b>Calcium+Vit<br/>D</b>    |                             |                             |                     |                     |            |  |
| <b>1.77<br/>(1.16,2.68)</b> | <b>1.70<br/>(1.08,2.67)</b>   | 1.33<br>(0.74,2.41)         | 1.13<br>(0.57,2.24)           | 1.07<br>(0.54,2.13)         | <b>2.09<br/>(1.47,2.99)</b> | <b>2.00<br/>(1.30,3.09)</b> | <b>Cele-400</b>             |                             |                     |                     |            |  |
| <b>2.26<br/>(1.40,3.65)</b> | <b>2.17<br/>(1.30,3.61)</b>   | 1.70<br>(0.90,3.22)         | 1.44<br>(0.70,2.97)           | 1.37<br>(0.67,2.83)         | <b>2.68<br/>(1.75,4.10)</b> | <b>2.56<br/>(1.56,4.20)</b> | 1.28<br>(0.89,1.84)         | <b>Cele-800</b>             |                     |                     |            |  |
| <b>0.69<br/>(0.49,0.98)</b> | <b>0.66<br/>(0.46,0.96)</b>   | <b>0.52<br/>(0.30,0.90)</b> | <b>0.44<br/>(0.23,0.83)</b>   | <b>0.42<br/>(0.21,0.86)</b> | 0.82<br>(0.54,1.23)         | 0.78<br>(0.49,1.26)         | <b>0.39<br/>(0.27,0.57)</b> | <b>0.31<br/>(0.19,0.48)</b> | <b>Folic acid</b>   |                     |            |  |
| 0.79<br>(0.47,1.32)         | 0.76<br>(0.44,1.31)           | 0.60<br>(0.31,1.16)         | 0.50<br>(0.24,1.07)           | 0.48<br>(0.23,1.02)         | 0.94<br>(0.65,1.35)         | 0.90<br>(0.60,1.33)         | <b>0.45<br/>(0.29,0.70)</b> | <b>0.35<br/>(0.21,0.58)</b> | 1.14<br>(0.70,1.87) | <b>VitD</b>         |            |  |
| 0.84<br>(0.59,1.19)         | 0.81<br>(0.55,1.19)           | 0.63<br>(0.37,1.09)         | 0.54<br>(0.28,1.02)           | <b>0.51<br/>(0.27,0.97)</b> | 0.99<br>(0.76,1.30)         | 0.95<br>(0.66,1.37)         | <b>0.48<br/>(0.38,0.60)</b> | <b>0.37<br/>(0.27,0.52)</b> | 1.22<br>(0.89,1.65) | 1.06<br>(0.72,1.56) | <b>PCB</b> |  |

**Abbreviations:** Antiox, antioxidants; ASA-HD, high-dose aspirin; ASA-LD, low-dose aspirin; Calcium, calcium supplements; Cele-400, celecoxib 400 mg/day; Cele-800, celecoxib 800 mg/day; PCB, placebo; VitD, vitamin D.

\*Comparison between treatments should be read from column to row for each outcome (row treatment is reference).

**Figure S8 SUCRA ranking curve for incidence of advanced adenomas (all studies)**

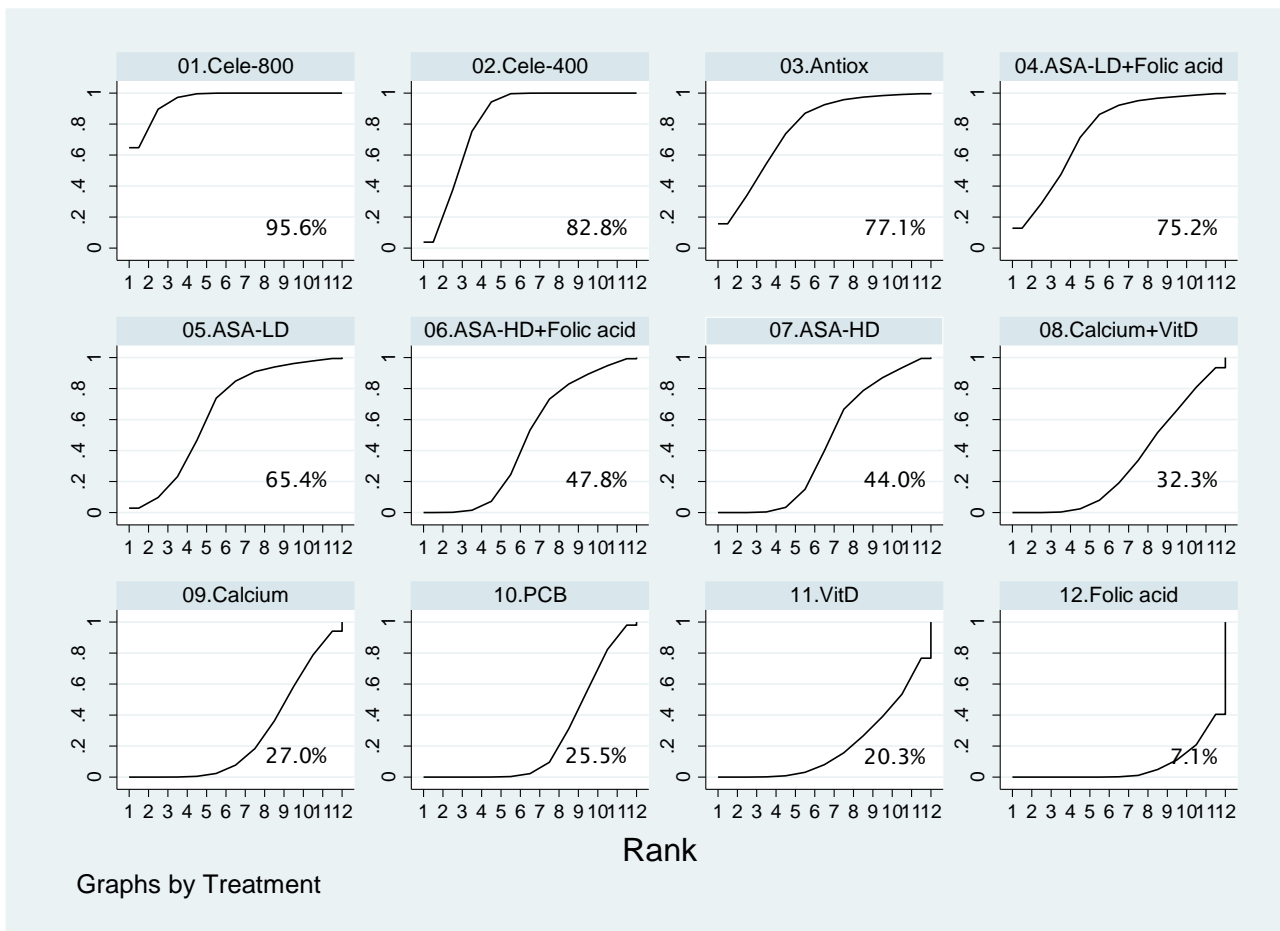

**Abbreviations:** Antiox, antioxidants; ASA-HD, high-dose aspirin; ASA-LD, low-dose aspirin; Calcium, calcium supplements; Cele-400, celecoxib 400 mg/day; Cele-800, celecoxib 800 mg/day; PCB, placebo; VitD, vitamin D.

## Sensitivity analyses of network meta-analysis

**Table S13 Results of sensitivity analyses of network meta-analysis for incidence of any adenomas**

| Intervention                               | All studies                 |            | Low ROB studies including celecoxib |            | Low ROB + High ROB excluding celecoxib |            | Low ROB studies excluding celecoxib* |            |
|--------------------------------------------|-----------------------------|------------|-------------------------------------|------------|----------------------------------------|------------|--------------------------------------|------------|
|                                            | RR [95% CI]                 | SUCRA rank | RR [95% CI]                         | SUCRA rank | RR [95% CI]                            | SUCRA rank | RR [95% CI]                          | SUCRA rank |
| Cele-800                                   | <b>0.61</b><br>[0.45, 0.83] | 1          | <b>0.61</b><br>[0.55, 0.69]         | 1          | -                                      | -          | -                                    | -          |
| Cele-400                                   | <b>0.70</b><br>[0.55, 0.87] | 2          | <b>0.70</b><br>[0.64, 0.75]         | 2          | -                                      | -          | -                                    | -          |
| ASA-LD+Folic acid                          | 0.71<br>[0.50, 1.00]        | 3          | <b>0.74</b><br>[0.58, 0.94]         | 3          | 0.71<br>[0.49, 1.03]                   | 1          | 0.80<br>[0.61, 1.05]                 | 1          |
| ASA-LD                                     | <b>0.75</b><br>[0.59, 0.96] | 4          | <b>0.79</b><br>[0.67, 0.94]         | 4          | <b>0.75</b><br>[0.58, 0.97]            | 2          | 0.91<br>[0.70, 1.17]                 | 2          |
| Calcium                                    | <b>0.81</b><br>[0.68, 0.97] | 5          | <b>0.88</b><br>[0.79, 0.99]         | 5          | <b>0.81</b><br>[0.66, 0.98]            | 3          | 0.93<br>[0.80, 1.09]                 | 3          |
| Antiox                                     | 0.86<br>[0.68, 1.07]        | 6          | 1.09<br>[0.91, 1.31]                | 12         | 0.85<br>[0.67, 1.07]                   | 4          | 1.09<br>[0.91, 1.31]                 | 10         |
| Calcium+VitD                               | 0.86<br>[0.66, 1.12]        | 7          | 0.92<br>[0.80, 1.05]                | 6          | 0.86<br>[0.64, 1.15]                   | 5          | 0.95<br>[0.82, 1.10]                 | 4          |
| VitD                                       | 0.90<br>[0.67, 1.22]        | 8          | 0.95<br>[0.82, 1.09]                | 9          | 0.90<br>[0.64, 1.26]                   | 6          | 0.98<br>[0.84, 1.13]                 | 6          |
| ASA-HD+Folic acid                          | 0.91<br>[0.70, 1.19]        | 9          | 0.96<br>[0.80, 1.15]                | 10         | 0.91<br>[0.69, 1.21]                   | 7          | 1.07<br>[0.84, 1.36]                 | 9          |
| ASA+Calcium+VitD                           | 0.94<br>[0.60, 1.45]        | 10         | 0.94<br>[0.68, 1.29]                | 7          | 0.94<br>[0.58, 1.50]                   | 8          | 0.94<br>[0.68, 1.29]                 | 5          |
| ASA-HD                                     | 0.92<br>[0.75, 1.13]        | 11         | 0.94<br>[0.81, 1.10]                | 8          | 0.92<br>[0.73, 1.15]                   | 9          | 1.04<br>[0.81, 1.33]                 | 8          |
| PCB                                        | reference                   | 12         | reference                           | 11         | reference                              | 10         | reference                            | 7          |
| Folic acid                                 | 1.05<br>[0.84, 1.31]        | 13         | 1.13<br>[0.96, 1.34]                | 13         | 1.05<br>[0.83, 1.33]                   | 11         | 1.20<br>[0.95, 1.51]                 | 11         |
| Overall inconsistency Chi-square (p value) | 7.57<br>(0.751)             |            | 17.97<br>(0.055)                    |            | 7.56<br>(0.672)                        |            | 17.73<br>(0.039)                     |            |
| <b>Number of studies</b>                   | <b>21</b>                   |            | <b>14</b>                           |            | <b>19</b>                              |            | <b>12</b>                            |            |

**Abbreviations:** Antiox, antioxidants; ASA-HD, high-dose aspirin; ASA-LD, low-dose aspirin; Calcium, calcium supplements; Cele-400, celecoxib 400 mg/day; Cele-800, celecoxib 800 mg/day; PCB, placebo; VitD, vitamin D.

\*The finding under inconsistency model.

Figure S9 Network estimated relative risk (95% confidence interval) of chemopreventive agents for incidence of any adenomas

i. Low ROB studies including celecoxib

|                             |                             |                             |                             |                             |                             |                             |                             |                             |                             |                     |                     |            |  |  |  |
|-----------------------------|-----------------------------|-----------------------------|-----------------------------|-----------------------------|-----------------------------|-----------------------------|-----------------------------|-----------------------------|-----------------------------|---------------------|---------------------|------------|--|--|--|
| <b>ASA+Calcium+VitD</b>     |                             |                             |                             |                             |                             |                             |                             |                             |                             |                     |                     |            |  |  |  |
| 0.99<br>(0.70,1.42)         | <b>ASA-HD</b>               |                             |                             |                             |                             |                             |                             |                             |                             |                     |                     |            |  |  |  |
| 0.98<br>(0.68,1.41)         | 0.98<br>(0.82,1.18)         | <b>ASA-HD+Folic acid</b>    |                             |                             |                             |                             |                             |                             |                             |                     |                     |            |  |  |  |
| 1.18<br>(0.82,1.69)         | 1.19<br>(0.98,1.43)         | 1.21<br>(0.98,1.48)         | <b>ASA-LD</b>               |                             |                             |                             |                             |                             |                             |                     |                     |            |  |  |  |
| 1.26<br>(0.84,1.89)         | <b>1.27<br/>(1.00,1.63)</b> | <b>1.29<br/>(1.01,1.67)</b> | 1.07<br>(0.83,1.39)         | <b>ASA-LD+Folic acid</b>    |                             |                             |                             |                             |                             |                     |                     |            |  |  |  |
| 0.86<br>(0.59,1.24)         | 0.86<br>(0.68,1.09)         | 0.88<br>(0.68,1.13)         | <b>0.73<br/>(0.57,0.93)</b> | <b>0.68<br/>(0.50,0.92)</b> | <b>Antiox</b>               |                             |                             |                             |                             |                     |                     |            |  |  |  |
| 1.06<br>(0.75,1.49)         | 1.07<br>(0.88,1.29)         | 1.08<br>(0.88,1.34)         | 0.90<br>(0.73,1.10)         | 0.84<br>(0.64,1.09)         | <b>1.24<br/>(1.00,1.53)</b> | <b>Calcium</b>              |                             |                             |                             |                     |                     |            |  |  |  |
| 1.02<br>(0.72,1.44)         | 1.03<br>(0.84,1.26)         | 1.04<br>(0.83,1.31)         | 0.86<br>(0.70,1.07)         | 0.81<br>(0.61,1.06)         | 1.19<br>(0.95,1.49)         | 0.96<br>(0.85,1.09)         | <b>Calcium+VitD</b>         |                             |                             |                     |                     |            |  |  |  |
| 1.34<br>(0.96,1.87)         | <b>1.35<br/>(1.14,1.60)</b> | <b>1.37<br/>(1.13,1.67)</b> | 1.14<br>(0.95,1.37)         | 1.06<br>(0.82,1.37)         | <b>1.57<br/>(1.28,1.91)</b> | <b>1.27<br/>(1.11,1.45)</b> | <b>1.32<br/>(1.13,1.54)</b> | <b>Cele-400</b>             |                             |                     |                     |            |  |  |  |
| <b>1.53<br/>(1.08,2.15)</b> | <b>1.54<br/>(1.27,1.86)</b> | <b>1.56<br/>(1.26,1.93)</b> | <b>1.29<br/>(1.06,1.58)</b> | 1.21<br>(0.92,1.58)         | <b>1.78<br/>(1.44,2.21)</b> | <b>1.44<br/>(1.23,1.69)</b> | <b>1.50<br/>(1.26,1.79)</b> | <b>1.14<br/>(1.01,1.29)</b> | <b>Cele-800</b>             |                     |                     |            |  |  |  |
| 0.83<br>(0.57,1.19)         | <b>0.83<br/>(0.70,0.99)</b> | 0.85<br>(0.71,1.01)         | <b>0.70<br/>(0.58,0.85)</b> | <b>0.65<br/>(0.51,0.83)</b> | 0.97<br>(0.75,1.24)         | <b>0.78<br/>(0.64,0.95)</b> | 0.81<br>(0.65,1.00)         | <b>0.62<br/>(0.51,0.74)</b> | <b>0.54<br/>(0.44,0.66)</b> | <b>Folic acid</b>   |                     |            |  |  |  |
| 0.98<br>(0.69,1.40)         | 0.99<br>(0.81,1.22)         | 1.01<br>(0.80,1.27)         | 0.84<br>(0.67,1.04)         | 0.78<br>(0.59,1.03)         | 1.15<br>(0.91,1.45)         | 0.93<br>(0.81,1.07)         | 0.97<br>(0.83,1.12)         | <b>0.73<br/>(0.62,0.86)</b> | <b>0.65<br/>(0.54,0.77)</b> | 1.19<br>(0.96,1.48) | <b>VitD</b>         |            |  |  |  |
| 0.94<br>(0.68,1.29)         | 0.94<br>(0.81,1.10)         | 0.96<br>(0.80,1.15)         | <b>0.79<br/>(0.67,0.94)</b> | <b>0.74<br/>(0.58,0.94)</b> | 1.09<br>(0.91,1.31)         | <b>0.88<br/>(0.79,0.99)</b> | 0.92<br>(0.80,1.05)         | <b>0.70<br/>(0.64,0.75)</b> | <b>0.61<br/>(0.55,0.69)</b> | 1.13<br>(0.96,1.34) | 0.95<br>(0.82,1.09) | <b>PCB</b> |  |  |  |

**Abbreviations:** Antiox, antioxidants; ASA-HD, high-dose aspirin; ASA-LD, low-dose aspirin; Calcium, calcium supplements; Cele-400, celecoxib 400 mg/day; Cele-800, celecoxib 800 mg/day; PCB, placebo; VitD, vitamin D.

\*Comparison between treatments should be read from column to row for each outcome (row treatment is reference).

ii. Low ROB + High ROB studies excluding celecoxib

|                          |                     |                           |                             |                           |                     |                             |                     |                     |                     |            |
|--------------------------|---------------------|---------------------------|-----------------------------|---------------------------|---------------------|-----------------------------|---------------------|---------------------|---------------------|------------|
| <b>ASA+Calcium+ VitD</b> |                     |                           |                             |                           |                     |                             |                     |                     |                     |            |
| 1.02<br>(0.60,1.72)      | <b>ASA-HD</b>       |                           |                             |                           |                     |                             |                     |                     |                     |            |
| 1.03<br>(0.59,1.78)      | 1.01<br>(0.75,1.36) | <b>ASA-HD+ Folic acid</b> |                             |                           |                     |                             |                     |                     |                     |            |
| 1.25<br>(0.73,2.14)      | 1.22<br>(0.91,1.64) | 1.21<br>(0.87,1.69)       | <b>ASA-LD</b>               |                           |                     |                             |                     |                     |                     |            |
| 1.32<br>(0.72,2.41)      | 1.30<br>(0.88,1.91) | 1.29<br>(0.86,1.92)       | 1.06<br>(0.71,1.59)         | <b>ASA-LD+ Folic acid</b> |                     |                             |                     |                     |                     |            |
| 1.11<br>(0.65,1.88)      | 1.09<br>(0.78,1.51) | 1.08<br>(0.75,1.56)       | 0.89<br>(0.63,1.26)         | 0.84<br>(0.54,1.30)       | <b>Antiox</b>       |                             |                     |                     |                     |            |
| 1.16<br>(0.69,1.93)      | 1.14<br>(0.85,1.53) | 1.13<br>(0.80,1.59)       | 0.93<br>(0.67,1.29)         | 0.88<br>(0.58,1.34)       | 1.05<br>(0.77,1.42) | <b>Calcium</b>              |                     |                     |                     |            |
| 1.09<br>(0.63,1.90)      | 1.07<br>(0.74,1.55) | 1.06<br>(0.71,1.60)       | 0.88<br>(0.59,1.29)         | 0.83<br>(0.51,1.33)       | 0.99<br>(0.68,1.43) | 0.94<br>(0.72,1.23)         | <b>Calcium+VitD</b> |                     |                     |            |
| 0.89<br>(0.52,1.51)      | 0.88<br>(0.67,1.15) | 0.87<br>(0.65,1.17)       | <b>0.72<br/>(0.53,0.97)</b> | 0.68<br>(0.46,1.00)       | 0.81<br>(0.58,1.13) | 0.77<br>(0.57,1.05)         | 0.82<br>(0.56,1.19) | <b>Folic acid</b>   |                     |            |
| 1.04<br>(0.58,1.86)      | 1.02<br>(0.68,1.53) | 1.01<br>(0.65,1.57)       | 0.83<br>(0.55,1.28)         | 0.79<br>(0.48,1.30)       | 0.94<br>(0.62,1.42) | 0.90<br>(0.64,1.25)         | 0.95<br>(0.67,1.36) | 1.17<br>(0.77,1.76) | <b>VitD</b>         |            |
| 0.94<br>(0.58,1.50)      | 0.92<br>(0.73,1.15) | 0.91<br>(0.69,1.21)       | <b>0.75<br/>(0.58,0.97)</b> | 0.71<br>(0.49,1.03)       | 0.85<br>(0.67,1.07) | <b>0.81<br/>(0.66,0.98)</b> | 0.86<br>(0.64,1.15) | 1.05<br>(0.83,1.33) | 0.90<br>(0.64,1.26) | <b>PCB</b> |

**Abbreviations:** Antiox, antioxidants; ASA-HD, high-dose aspirin; ASA-LD, low-dose aspirin; Calcium, calcium supplements; PCB, placebo; VitD, vitamin D.

\*Comparison between treatments should be read from column to row for each outcome (row treatment is reference).



### iii. Low ROB studies excluding celecoxib\*\*

|                              |                     |                               |                             |                               |                     |                     |                     |                     |                     |            |
|------------------------------|---------------------|-------------------------------|-----------------------------|-------------------------------|---------------------|---------------------|---------------------|---------------------|---------------------|------------|
| <b>ASA+Calcium+<br/>VitD</b> |                     |                               |                             |                               |                     |                     |                     |                     |                     |            |
| 0.90<br>(0.60,1.35)          | <b>ASA-HD</b>       |                               |                             |                               |                     |                     |                     |                     |                     |            |
| 0.88<br>(0.59,1.31)          | 0.98<br>(0.77,1.24) | <b>ASA-HD+<br/>Folic acid</b> |                             |                               |                     |                     |                     |                     |                     |            |
| 1.03<br>(0.68,1.56)          | 1.15<br>(0.89,1.48) | 1.18<br>(0.91,1.51)           | <b>ASA-LD</b>               |                               |                     |                     |                     |                     |                     |            |
| 1.17<br>(0.77,1.79)          | 1.30<br>(0.99,1.71) | <b>1.33<br/>(1.02,1.74)</b>   | 1.13<br>(0.86,1.50)         | <b>ASA-LD+<br/>Folic acid</b> |                     |                     |                     |                     |                     |            |
| 0.86<br>(0.59,1.24)          | 0.95<br>(0.70,1.29) | 0.98<br>(0.72,1.32)           | 0.83<br>(0.60,1.14)         | 0.73<br>(0.53,1.02)           | <b>Antiox</b>       |                     |                     |                     |                     |            |
| 1.00<br>(0.70,1.43)          | 1.12<br>(0.83,1.49) | 1.14<br>(0.86,1.52)           | 0.97<br>(0.72,1.31)         | 0.86<br>(0.63,1.17)           | 1.17<br>(0.92,1.49) | <b>Calcium</b>      |                     |                     |                     |            |
| 0.99<br>(0.69,1.41)          | 1.10<br>(0.82,1.46) | 1.12<br>(0.85,1.49)           | 0.96<br>(0.71,1.29)         | 0.84<br>(0.62,1.15)           | 1.15<br>(0.91,1.46) | 0.99<br>(0.77,1.27) | <b>Calcium+VitD</b> |                     |                     |            |
| 0.73<br>(0.53,1.16)          | 0.87<br>(0.69,1.09) | 0.89<br>(0.71,1.11)           | <b>0.76<br/>(0.60,0.96)</b> | <b>0.67<br/>(0.52,0.86)</b>   | 0.91<br>(0.68,1.22) | 0.78<br>(0.59,1.02) | 0.79<br>(0.60,1.04) | <b>Folic acid</b>   |                     |            |
| 0.96<br>(0.67,1.37)          | 1.07<br>(0.80,1.42) | 1.09<br>(0.82,1.45)           | 0.93<br>(0.69,1.25)         | 0.82<br>(0.60,1.12)           | 1.12<br>(0.88,1.42) | 0.96<br>(0.82,1.11) | 0.97<br>(0.83,1.13) | 1.23<br>(0.93,1.61) | <b>VitD</b>         |            |
| 0.94<br>(0.68,1.29)          | 1.04<br>(0.81,1.33) | 1.07<br>(0.84,1.36)           | 0.91<br>(0.70,1.17)         | 0.80<br>(0.61,1.05)           | 1.09<br>(0.91,1.31) | 0.93<br>(0.80,1.09) | 0.95<br>(0.82,1.10) | 1.20<br>(0.95,1.51) | 0.98<br>(0.84,1.13) | <b>PCB</b> |

**Abbreviations:** Antiox, antioxidants; ASA-HD, high-dose aspirin; ASA-LD, low-dose aspirin; Calcium, calcium supplements; PCB, placebo; VitD, vitamin D.

\*Comparison between treatments should be read from column to row for each outcome (row treatment is reference).

\*\*The finding under inconsistency model.

**Table S14 Results of sensitivity analyses of network meta-analysis for incidence of advanced adenomas**

| Intervention                               | All studies                 |            | Low ROB studies including celecoxib |            | Low ROB + High ROB excluding celecoxib |            | Low ROB studies excluding celecoxib |            |
|--------------------------------------------|-----------------------------|------------|-------------------------------------|------------|----------------------------------------|------------|-------------------------------------|------------|
|                                            | RR [95% CI]                 | SUCRA rank | RR [95% CI]                         | SUCRA rank | RR [95% CI]                            | SUCRA rank | RR [95% CI]                         | SUCRA rank |
| Cele-800                                   | <b>0.37</b><br>[0.27, 0.52] | 1          | <b>0.37</b><br>[0.26, 0.53]         | 1          | -                                      | -          | -                                   | -          |
| Cele-400                                   | <b>0.48</b><br>[0.38, 0.60] | 2          | <b>0.48</b><br>[0.37, 0.61]         | 2          | -                                      | -          | -                                   | -          |
| Antiox                                     | <b>0.51</b><br>[0.27, 0.97] | 3          | -                                   | -          | <b>0.51</b><br>[0.26, 0.99]            | 1          | -                                   | -          |
| ASA-LD+Folic acid                          | 0.54<br>[0.28, 1.02]        | 4          | 0.56<br>[0.29, 1.09]                | 3          | 0.54<br>[0.28, 1.06]                   | 2          | 0.57<br>[0.28, 1.16]                | 1          |
| ASA-LD                                     | 0.63<br>[0.37, 1.09]        | 5          | 0.66<br>[0.37, 1.15]                | 4          | 0.64<br>[0.36, 1.12]                   | 3          | 0.67<br>[0.37, 1.20]                | 2          |
| ASA-HD+Folic acid                          | 0.81<br>[0.55, 1.19]        | 6          | 0.84<br>[0.56, 1.27]                | 5          | 0.81<br>[0.54, 1.23]                   | 4          | 0.85<br>[0.54, 1.34]                | 3          |
| ASA-HD                                     | 0.84<br>[0.59, 1.19]        | 7          | 0.87<br>[0.60, 1.25]                | 6          | 0.84<br>[0.59, 1.22]                   | 5          | 0.88<br>[0.59, 1.31]                | 4          |
| Calcium+VitD                               | 0.95<br>[0.66, 1.37]        | 8          | 0.95<br>[0.65, 1.40]                | 7          | 0.96<br>[0.64, 1.43]                   | 6          | 0.96<br>[0.62, 1.49]                | 5          |
| Calcium                                    | 0.99<br>[0.76, 1.30]        | 9          | 0.99<br>[0.74, 1.33]                | 8          | 1.00<br>[0.75, 1.33]                   | 7          | 0.99<br>[0.71, 1.40]                | 6          |
| PCB                                        | reference                   | 10         | reference                           | 9          | reference                              | 8          | reference                           | 7          |
| VitD                                       | 1.06<br>[0.72, 1.56]        | 11         | 1.06<br>[0.71, 1.59]                | 10         | 1.07<br>[0.70, 1.63]                   | 9          | 1.07<br>[0.67, 1.72]                | 8          |
| Folic acid                                 | 1.22<br>[0.89, 1.65]        | 12         | 1.31<br>[0.91, 1.88]                | 11         | 1.22<br>[0.88, 1.70]                   | 10         | 1.33<br>[0.88, 2.00]                | 9          |
| Overall inconsistency Chi-square (p value) | 7.34<br>(0.771)             |            | 4.15<br>(0.940)                     |            | 7.21<br>(0.706)                        |            | 4.10<br>(0.905)                     |            |
| <b>Number of studies</b>                   | <b>15</b>                   |            | <b>11</b>                           |            | <b>13</b>                              |            | <b>9</b>                            |            |

**Abbreviations:** Antiox, antioxidants; ASA-HD, high-dose aspirin; ASA-LD, low-dose aspirin; Calcium, calcium supplements; Cele-400, celecoxib 400 mg/day; Cele-800, celecoxib 800 mg/day; PCB, placebo; VitD, vitamin D.

**Figure S10 Network estimated relative risk (95% confidence interval) of chemopreventive agents for incidence of advanced adenomas**

**i. Low ROB studies including celecoxib**

|                                   |                                   |                                   |                                   |                                   |                                   |                                   |                                   |                     |                     |            |  |
|-----------------------------------|-----------------------------------|-----------------------------------|-----------------------------------|-----------------------------------|-----------------------------------|-----------------------------------|-----------------------------------|---------------------|---------------------|------------|--|
| <b>ASA-HD</b>                     |                                   |                                   |                                   |                                   |                                   |                                   |                                   |                     |                     |            |  |
| 1.03<br>(0.68,1.57)               | <b>ASA-HD+<br/>Folic acid</b>     |                                   |                                   |                                   |                                   |                                   |                                   |                     |                     |            |  |
| 1.33<br>(0.75,2.34)               | 1.28<br>(0.71,2.33)               | <b>ASA-LD</b>                     |                                   |                                   |                                   |                                   |                                   |                     |                     |            |  |
| 1.55<br>(0.80,3.00)               | 1.50<br>(0.77,2.93)               | 1.17<br>(0.54,2.52)               | <b>ASA-LD+<br/>Folic acid</b>     |                                   |                                   |                                   |                                   |                     |                     |            |  |
| 0.88<br>(0.55,1.41)               | 0.85<br>(0.51,1.41)               | 0.66<br>(0.35,1.25)               | 0.57<br>(0.27,1.17)               | <b>Calcium</b>                    |                                   |                                   |                                   |                     |                     |            |  |
| 0.92<br>(0.54,1.55)               | 0.88<br>(0.51,1.55)               | 0.69<br>(0.35,1.36)               | 0.59<br>(0.27,1.27)               | 1.04<br>(0.74,1.47)               | <b>Calcium+VitD</b>               |                                   |                                   |                     |                     |            |  |
| <b>1.83</b><br><b>(1.18,2.84)</b> | <b>1.77</b><br><b>(1.09,2.85)</b> | 1.38<br>(0.75,2.54)               | 1.18<br>(0.58,2.39)               | <b>2.08</b><br><b>(1.41,3.06)</b> | <b>2.00</b><br><b>(1.26,3.16)</b> | <b>Cele-400</b>                   |                                   |                     |                     |            |  |
| <b>2.34</b><br><b>(1.41,3.87)</b> | <b>2.26</b><br><b>(1.32,3.87)</b> | 1.76<br>(0.91,3.40)               | 1.50<br>(0.71,3.18)               | <b>2.66</b><br><b>(1.68,4.20)</b> | <b>2.55</b><br><b>(1.52,4.29)</b> | 1.28<br>(0.87,1.87)               | <b>Cele-800</b>                   |                     |                     |            |  |
| <b>0.67</b><br><b>(0.46,0.96)</b> | <b>0.64</b><br><b>(0.44,0.95)</b> | <b>0.50</b><br><b>(0.28,0.88)</b> | <b>0.43</b><br><b>(0.23,0.82)</b> | 0.76<br>(0.47,1.21)               | 0.73<br>(0.43,1.23)               | <b>0.36</b><br><b>(0.23,0.57)</b> | <b>0.29</b><br><b>(0.17,0.47)</b> | <b>Folic acid</b>   |                     |            |  |
| 0.82<br>(0.48,1.41)               | 0.79<br>(0.45,1.41)               | 0.62<br>(0.31,1.23)               | 0.53<br>(0.24,1.15)               | 0.93<br>(0.64,1.37)               | 0.90<br>(0.59,1.35)               | <b>0.45</b><br><b>(0.28,0.72)</b> | <b>0.35</b><br><b>(0.21,0.60)</b> | 1.23<br>(0.72,2.11) | <b>VitD</b>         |            |  |
| 0.87<br>(0.60,1.25)               | 0.84<br>(0.56,1.27)               | 0.66<br>(0.37,1.15)               | 0.56<br>(0.29,1.09)               | 0.99<br>(0.74,1.33)               | 0.95<br>(0.65,1.40)               | <b>0.48</b><br><b>(0.37,0.61)</b> | <b>0.37</b><br><b>(0.26,0.53)</b> | 1.31<br>(0.91,1.88) | 1.06<br>(0.71,1.59) | <b>PCB</b> |  |

**Abbreviations:** ASA-HD, high-dose aspirin; ASA-LD, low-dose aspirin; Calcium, calcium supplements; Cele-400, celecoxib 400 mg/day; Cele-800, celecoxib 800 mg/day; PCB, placebo; VitD, vitamin D.

\*Comparison between treatments should be read from column to row for each outcome (row treatment is reference).

ii. Low ROB + High ROB studies excluding celecoxib

|                     |                             |                             |                             |                             |                     |                     |                     |                     |            |
|---------------------|-----------------------------|-----------------------------|-----------------------------|-----------------------------|---------------------|---------------------|---------------------|---------------------|------------|
| <b>ASA-HD</b>       |                             |                             |                             |                             |                     |                     |                     |                     |            |
| 1.04<br>(0.68,1.59) | <b>ASA-HD+Folic acid</b>    |                             |                             |                             |                     |                     |                     |                     |            |
| 1.32<br>(0.74,2.35) | 1.27<br>(0.69,2.33)         | <b>ASA-LD</b>               |                             |                             |                     |                     |                     |                     |            |
| 1.56<br>(0.80,3.06) | 1.50<br>(0.76,2.97)         | 1.18<br>(0.54,2.58)         | <b>ASA-LD+Folic acid</b>    |                             |                     |                     |                     |                     |            |
| 1.67<br>(0.77,3.59) | 1.60<br>(0.73,3.54)         | 1.26<br>(0.52,3.04)         | 1.07<br>(0.41,2.76)         | <b>Antiox</b>               |                     |                     |                     |                     |            |
| 0.85<br>(0.53,1.35) | 0.82<br>(0.49,1.35)         | 0.64<br>(0.34,1.21)         | 0.54<br>(0.26,1.12)         | 0.51<br>(0.24,1.06)         | <b>Calcium</b>      |                     |                     |                     |            |
| 0.88<br>(0.52,1.51) | 0.85<br>(0.48,1.50)         | 0.67<br>(0.34,1.32)         | 0.56<br>(0.26,1.23)         | 0.53<br>(0.24,1.16)         | 1.04<br>(0.73,1.49) | <b>Calcium+VitD</b> |                     |                     |            |
| 0.69<br>(0.48,1.00) | <b>0.66<br/>(0.45,0.99)</b> | <b>0.52<br/>(0.30,0.93)</b> | <b>0.44<br/>(0.23,0.85)</b> | <b>0.41<br/>(0.20,0.88)</b> | 0.82<br>(0.53,1.26) | 0.78<br>(0.47,1.31) | <b>Folic acid</b>   |                     |            |
| 0.79<br>(0.45,1.38) | 0.76<br>(0.42,1.37)         | 0.60<br>(0.30,1.21)         | 0.51<br>(0.23,1.12)         | 0.47<br>(0.21,1.05)         | 0.93<br>(0.62,1.40) | 0.90<br>(0.58,1.39) | 1.15<br>(0.67,1.95) | <b>VitD</b>         |            |
| 0.84<br>(0.59,1.22) | 0.81<br>(0.54,1.23)         | 0.64<br>(0.36,1.12)         | 0.54<br>(0.28,1.06)         | <b>0.51<br/>(0.26,0.99)</b> | 1.00<br>(0.75,1.33) | 0.96<br>(0.64,1.43) | 1.22<br>(0.88,1.70) | 1.07<br>(0.70,1.63) | <b>PCB</b> |

**Abbreviations:** Antiox, antioxidants; ASA-HD, high-dose aspirin; ASA-LD, low-dose aspirin; Calcium, calcium supplements; PCB, placebo; VitD, vitamin D.

\*Comparison between treatments should be read from column to row for each outcome (row treatment is reference).

### iii. Low ROB studies excluding celecoxib

|                     |                             |                             |                             |                     |                     |                     |                     |            |
|---------------------|-----------------------------|-----------------------------|-----------------------------|---------------------|---------------------|---------------------|---------------------|------------|
| <b>ASA-HD</b>       |                             |                             |                             |                     |                     |                     |                     |            |
| 1.03<br>(0.66,1.62) | <b>ASA-HD+Folic acid</b>    |                             |                             |                     |                     |                     |                     |            |
| 1.32<br>(0.73,2.40) | 1.28<br>(0.68,2.40)         | <b>ASA-LD</b>               |                             |                     |                     |                     |                     |            |
| 1.54<br>(0.77,3.11) | 1.50<br>(0.74,3.05)         | 1.17<br>(0.52,2.62)         | <b>ASA-LD+Folic acid</b>    |                     |                     |                     |                     |            |
| 0.89<br>(0.53,1.49) | 0.86<br>(0.49,1.51)         | 0.67<br>(0.34,1.32)         | 0.57<br>(0.26,1.25)         | <b>Calcium</b>      |                     |                     |                     |            |
| 0.92<br>(0.51,1.66) | 0.89<br>(0.48,1.67)         | 0.70<br>(0.34,1.45)         | 0.59<br>(0.26,1.36)         | 1.04<br>(0.70,1.53) | <b>Calcium+VitD</b> |                     |                     |            |
| 0.66<br>(0.44,1.00) | <b>0.64<br/>(0.42,0.99)</b> | <b>0.50<br/>(0.28,0.92)</b> | <b>0.43<br/>(0.22,0.85)</b> | 0.75<br>(0.44,1.27) | 0.72<br>(0.40,1.31) | <b>Folic acid</b>   |                     |            |
| 0.82<br>(0.45,1.53) | 0.80<br>(0.42,1.53)         | 0.63<br>(0.30,1.32)         | 0.53<br>(0.23,1.24)         | 0.93<br>(0.59,1.46) | 0.90<br>(0.55,1.46) | 1.24<br>(0.67,2.32) | <b>VitD</b>         |            |
| 0.88<br>(0.59,1.31) | 0.85<br>(0.54,1.34)         | 0.67<br>(0.37,1.20)         | 0.57<br>(0.28,1.16)         | 0.99<br>(0.71,1.40) | 0.96<br>(0.62,1.49) | 1.33<br>(0.88,2.00) | 1.07<br>(0.67,1.72) | <b>PCB</b> |

**Abbreviations:**ASA-HD, high-dose aspirin; ASA-LD, low-dose aspirin; Calcium, calcium supplements;PCB, placebo; VitD, vitamin D.

\*Comparison between treatments should be read from column to row for each outcome (row treatment is reference).

**Supplementary 10**  
**GRADE summary of evidence**

**Table S15 GRADE Summary of evidence (all studies)**

| Comparisons                                        | Direct evidence<br>(from pairwise meta-analysis) |                        | Indirect evidence<br>(from node-splitting) |                        | Network meta-analysis |                        |
|----------------------------------------------------|--------------------------------------------------|------------------------|--------------------------------------------|------------------------|-----------------------|------------------------|
|                                                    | RR<br>[95% CI]                                   | Quality of<br>evidence | RR<br>[95% CI]                             | Quality of<br>evidence | RR<br>[95% CI]        | Quality of<br>evidence |
| Any adenomas                                       |                                                  |                        |                                            |                        |                       |                        |
| Celecoxib 400mg/day versus Placebo                 | 0.70<br>[0.64, 0.76]                             | High                   | 0.71<br>[0.54, 0.89]                       | High                   | 0.70<br>[0.55, 0.87]  | High                   |
| Celecoxib 800mg/day versus Placebo                 | 0.62<br>[0.55, 0.69]                             | High                   | 0.57<br>[0.22, 1.50]                       | High                   | 0.61<br>[0.45, 0.83]  | High                   |
| Low-dose aspirin versus Placebo                    | 0.83<br>[0.70, 0.99]                             | Moderate <sup>a</sup>  | 0.39<br>[0.23, 0.67]                       | Low <sup>b</sup>       | 0.75<br>[0.59, 0.96]  | Moderate               |
| Calcium versus Placebo                             | 0.83<br>[0.75, 0.93]                             | Low <sup>c, d</sup>    | 0.95<br>[0.33, 2.70]                       | Low <sup>e</sup>       | 0.81<br>[0.68, 0.97]  | Low                    |
| Celecoxib 800mg/day versus<br>Celecoxib 400 mg/day | 0.87<br>[0.76, 0.99]                             | High                   | 0.94<br>[0.36, 2.47]                       | High                   | 0.88<br>[0.65, 1.19]  | High                   |
| Celecoxib 400 mg/day versus<br>Low-dose aspirin    | NA                                               | -                      | 0.93<br>[0.66, 1.28]                       | Moderate <sup>f</sup>  | 0.93<br>[0.66, 1.28]  | Moderate               |
| Celecoxib 400mg/day versus Calcium                 | NA                                               | -                      | 0.86<br>[0.65, 1.15]                       | Moderate <sup>f</sup>  | 0.86<br>[0.65, 1.15]  | Moderate               |
| Low-dose aspirin versus Calcium                    | NA                                               | -                      | 0.93<br>[0.69, 1.26]                       | Low <sup>f</sup>       | 0.93<br>[0.69, 1.26]  | Low                    |
| Low-dose aspirin versus High-dose aspirin          | 0.67<br>[0.37, 1.21]                             | Low <sup>g, h</sup>    | 1.17<br>[0.74, 1.87]                       | Low <sup>i</sup>       | 0.82<br>[0.63, 1.08]  | Low                    |

<sup>a</sup> Imprecision (the optimal information size criterion is not achieved (addressed by Trial Sequential Analysis)); <sup>b</sup> Contributing direct evidence of moderate quality and intransitivity (time difference in outcome measures and dose variations); <sup>c</sup> Limitations (risk of bias) and <sup>d</sup> indirectness (interventions were delivered in different doses and the duration of follow-up varied among these studies); <sup>e</sup> Contributing direct evidence of low quality and intransitivity; <sup>f</sup> Intransitivity; <sup>g</sup> Inconsistency explained by I<sup>2</sup> statistic; <sup>h</sup> Indirectness (time difference in outcome measures and dose variations, difference in population in one study); <sup>i</sup> Contributing direct evidence of low quality and intransitivity.  
NA: not available.

Comparison-adjusted funnel plot for each outcome from the network meta-analyses

Figure S11 Comparison-adjusted funnel plot for the network of incidence of any adenomas in all comparison

i. All studies

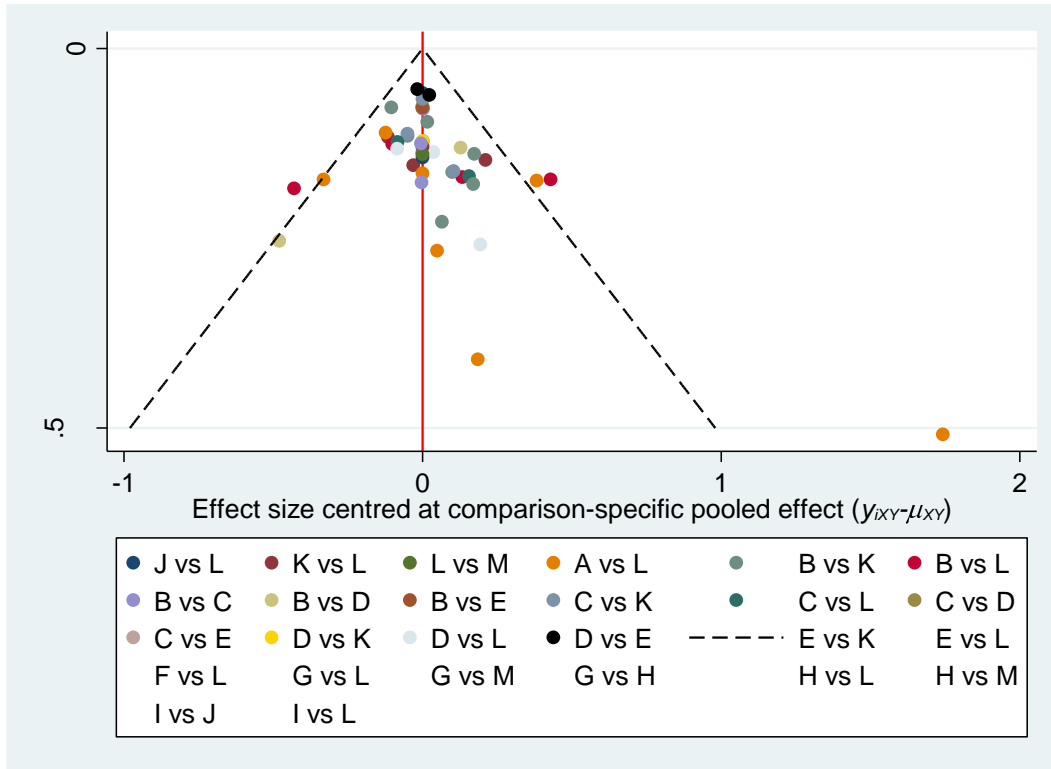

A, ASA+Calcium+VitD; B, ASA-HD; C, ASA-HD+Folic acid; D, ASA-LD; E, ASA-LD+Folic acid; F, Antiox; G, Calcium; H, Calcium+VitD; I, Cele-400; J, Cele-800; K, Folic acid; L, PCB; M, VitD.

ii. Low ROB studies including celecoxib

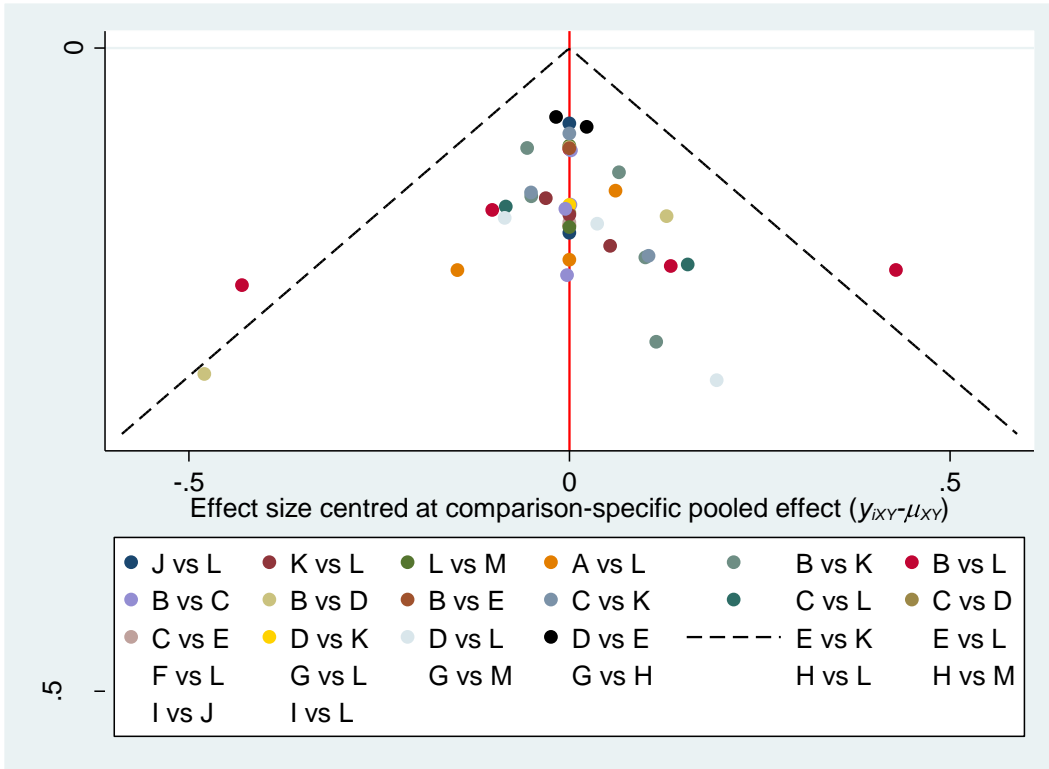

A, ASA+Calcium+VitD; B, ASA-HD; C, ASA-HD+Folic acid; D, ASA-LD; E, ASA-LD+Folic acid; F, Antiox; G, Calcium; H, Calcium+VitD; I, Cele-400; J, Cele-800; K, Folic acid; L, PCB; M, VitD.

iii. Low ROB + High ROB studies excluding celecoxib

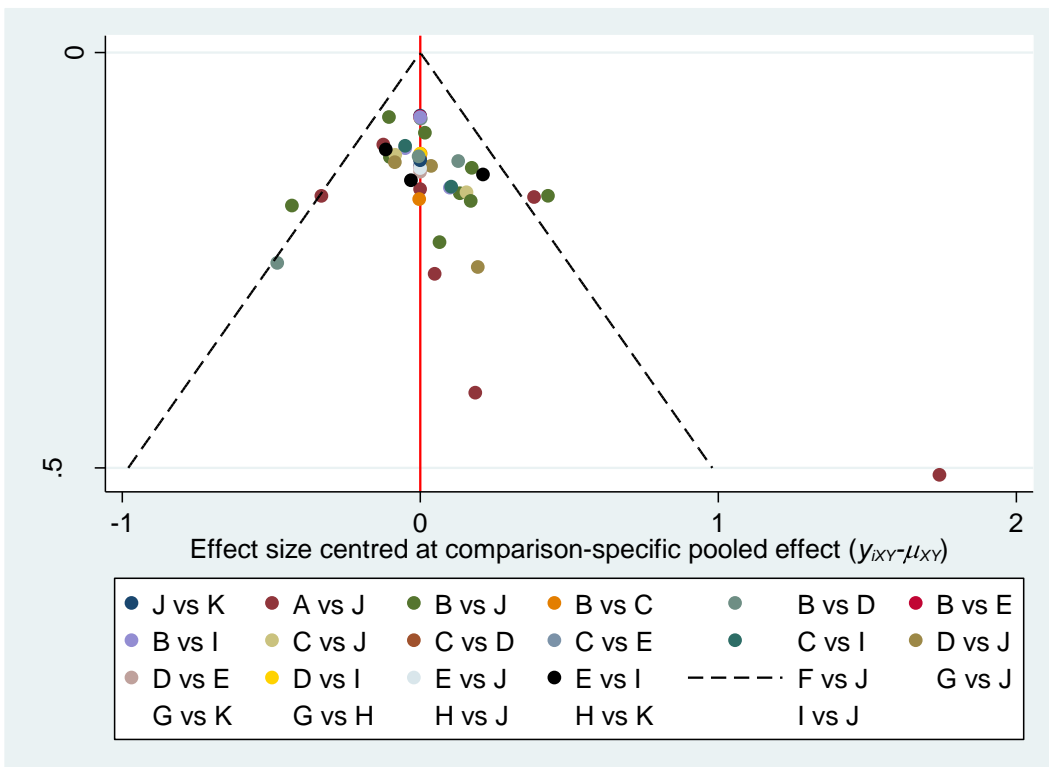

A, ASA+Calcium+VitD; B, ASA-HD; C, ASA-HD+Folic acid; D, ASA-LD; E, ASA-LD+Folic acid; F, Antiox; G, Calcium; H, Calcium+VitD; I, Folic acid; J, PCB; K, VitD.



iv. LowROB studies excluding celecoxib

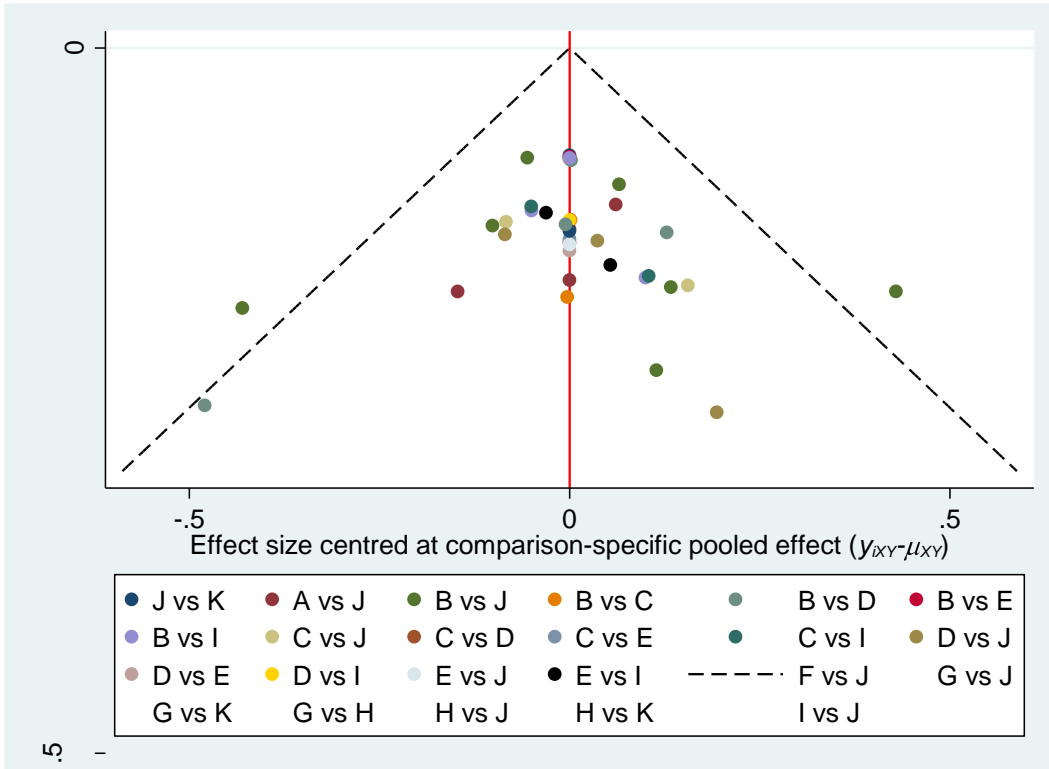

A, ASA+Calcium+VitD; B, ASA-HD; C, ASA-HD+Folic acid; D, ASA-LD; E, ASA-LD+Folic acid; F, Antiox;  
 G, Calcium; H, Calcium+VitD; I, Folic acid; J, PCB; K, VitD.

**Figure S12 Comparison-adjusted funnel plot for the network of incidence of advanced adenomas in all comparison**

**i. All studies**

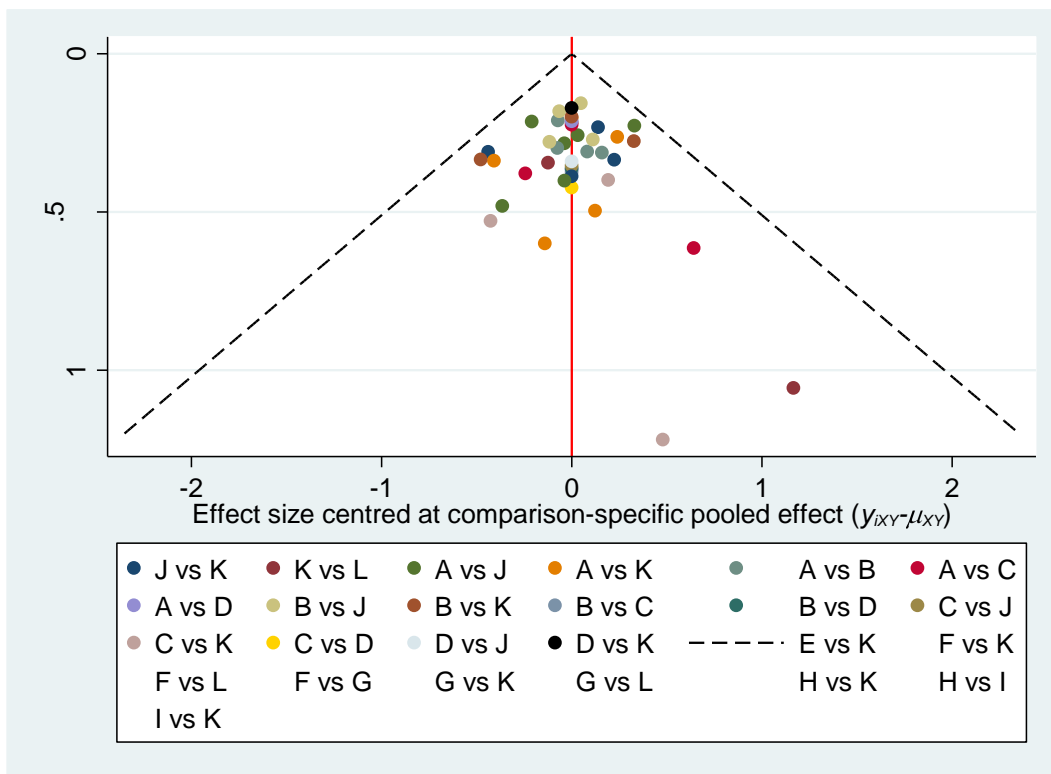

A, ASA-HD; B, ASA-HD+Folic acid; C, ASA-LD; D, ASA-LD+Folic acid; E, Antiox; F, Calcium; G, Calcium+VitD; H, Cele-400; I, Cele-800; J, Folic acid; K, PCB; L, VitD.

ii. Low ROB studies including celecoxib

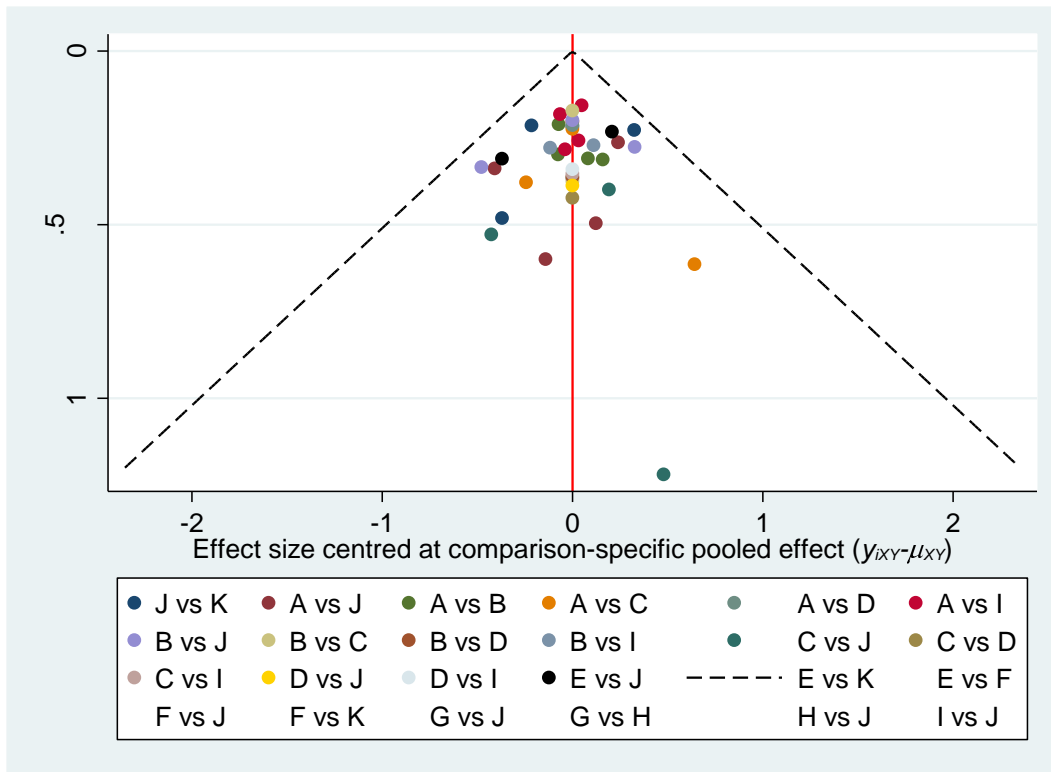

A, ASA-HD; B, ASA-HD+Folic acid; C, ASA-LD; D, ASA-LD+Folic acid; E, Calcium; F, Calcium+VitD; G, Cele-400; H, Cele-800; I, Folic acid; J, PCB; K, VitD.

iii. Low ROB + High ROB studies excluding celecoxib

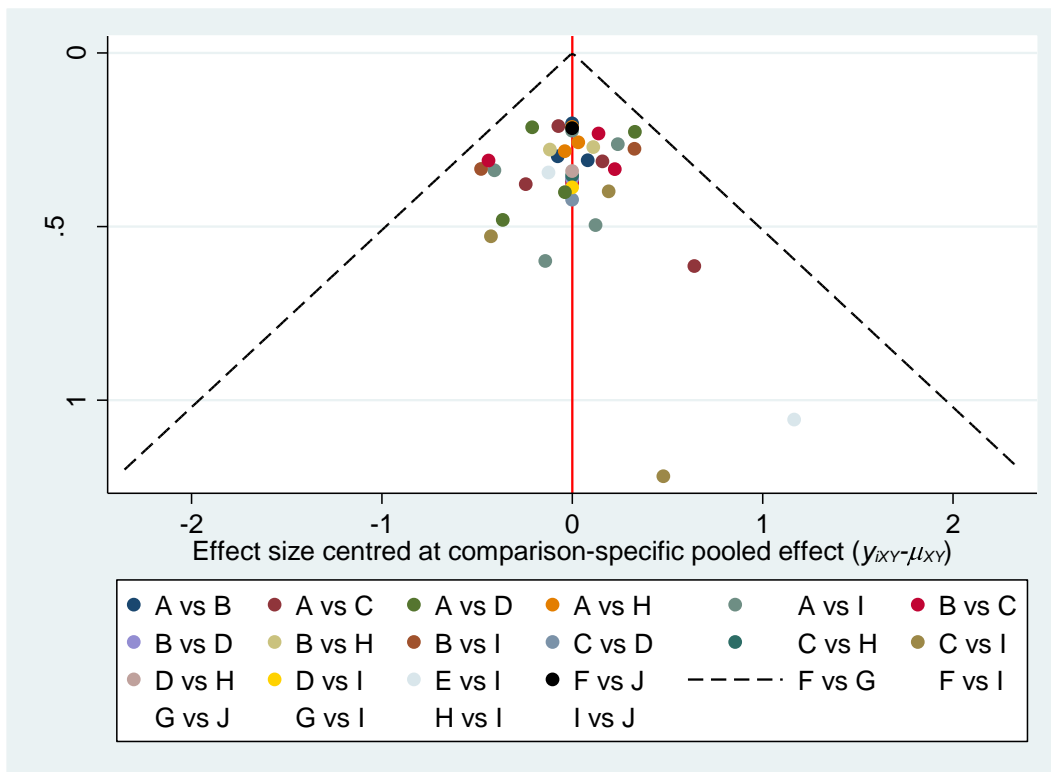

A, ASA-HD; B, ASA-HD+Folic acid; C, ASA-LD; D, ASA-LD+Folic acid; E, Antiox; F, Calcium; G, Calcium+VitD; H, Folic acid; I, PCB; J, VitD.

iv. Low ROB studies excluding celecoxib

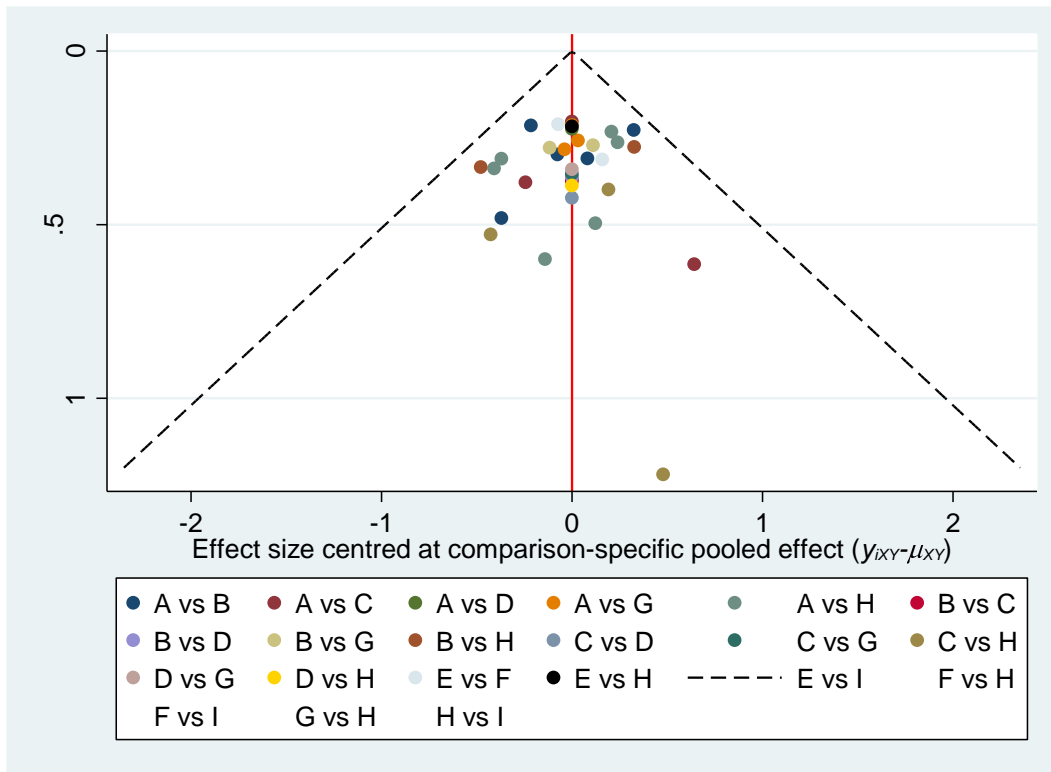

A, ASA-HD; B, ASA-HD+Folic acid; C, ASA-LD; D, ASA-LD+Folic acid; E, Calcium; F, Calcium+VitD; G, Folic acid; H, PCB; I, VitD.

## References of included studies

1. McKeown-Eyssen G, Holloway C, Jazmaji V, Bright-See E, Dion P, Bruce WR. A randomized trial of vitamins C and E in the prevention of recurrence of colorectal polyps. *Cancer Res* **1988**; 48:4701-5.
2. Roncucci L, Di Donato P, Carati L, et al. Antioxidant vitamins or lactulose for the prevention of the recurrence of colorectal adenomas. Colorectal Cancer Study Group of the University of Modena and the Health Care District 16. *Dis Colon Rectum* **1993**; 36:227-34.
3. Greenberg ER, Baron JA, Tosteson TD, et al. A clinical trial of antioxidant vitamins to prevent colorectal adenoma. Polyp Prevention Study Group. *N Engl J Med* **1994**; 331:141-7.
4. MacLennan R, Macrae F, Bain C, et al. Randomized trial of intake of fat, fiber, and beta carotene to prevent colorectal adenomas. *J Natl Cancer Inst* **1995**; 87:1760-6.
5. Ponz de Leon M, Roncucci L. Chemoprevention of colorectal tumors: role of lactulose and of other agents. *Scand J Gastroenterol Suppl* **1997**; 222:72-5.
6. Hofstad B, Almendingen K, Vatn M, et al. Growth and recurrence of colorectal polyps: a double-blind 3-year intervention with calcium and antioxidants. *Digestion* **1998**; 59:148-56.
7. Baron JA, Beach M, Mandel JS, et al. Calcium supplements for the prevention of colorectal adenomas. Calcium Polyp Prevention Study Group. *N Engl J Med* **1999**; 340:101-7.
8. Bonithon-Kopp C, Kronborg O, Giacosa A, Rath U, Faivre J. Calcium and fibre supplementation in prevention of colorectal adenoma recurrence: a randomised intervention trial. European Cancer Prevention Organisation Study Group. *Lancet* **2000**; 356:1300-6.
9. Baron JA, Cole BF, Sandler RS, et al. A randomized trial of aspirin to prevent colorectal adenomas. *N Engl J Med* **2003**; 348:891-9.
10. Cole BF, Baron JA, Sandler RS, et al. Folic acid for the prevention of colorectal adenomas: a randomized clinical trial. *JAMA* **2007**; 297:2351-9.
11. Sandler RS, Halabi S, Baron JA, et al. A randomized trial of aspirin to prevent colorectal adenomas in patients with previous colorectal cancer. *N Engl J Med* **2003**; 348:883-90.
12. Arber N, Eagle CJ, Spicak J, et al. Celecoxib for the prevention of colorectal adenomatous polyps. *N Engl J Med* **2006**; 355:885-95.
13. Bertagnolli MM, Eagle CJ, Zauber AG, et al. Celecoxib for the prevention of sporadic colorectal adenomas. *N Engl J Med* **2006**; 355:873-84.
14. Logan RF, Grainge MJ, Shepherd VC, Armitage NC, Muir KR. Aspirin and folic acid for the prevention of recurrent colorectal adenomas. *Gastroenterology* **2008**; 134:29-38.
15. Wu K, Platz EA, Willett WC, et al. A randomized trial on folic acid supplementation and risk of recurrent colorectal adenoma. *Am J Clin Nutr* **2009**; 90:1623-31.
16. Chu DZ, Hussey MA, Alberts DS, et al. Colorectal Chemoprevention Pilot Study (SWOG-9041), randomized and placebo controlled: the importance of multiple luminal lesions. *Clin Colorectal Cancer* **2011**; 10:310-6.
17. Benamouzig R, Uzzan B, Deyra J, et al. Prevention by daily soluble aspirin of colorectal adenoma recurrence: 4-year results of the APACC randomised trial. *Gut* **2012**; 61:255-61.
18. Bonelli L, Puntoni M, Gatteschi B, et al. Antioxidant supplement and long-term reduction of recurrent adenomas of the large bowel. A double-blind randomized trial. *J Gastroenterol* **2013**; 48:698-705.
19. Ishikawa H, Mutoh M, Suzuki S, et al. The preventive effects of low-dose enteric-coated aspirin tablets on the development of colorectal tumours in Asian patients: a randomised trial. *Gut* **2014**; 63:1755-9.
20. Baron JA, Barry EL, Mott LA, et al. A Trial of Calcium and Vitamin D for the Prevention of Colorectal Adenomas. *N Engl J Med* **2015**; 373:1519-30.
21. Pommergaard HC, Burcharth J, Rosenberg J, Raskov H. Aspirin, calcitriol, and calcium do not prevent adenoma recurrence in a randomized controlled trial. *Gastroenterology* **2016**; 150:114-22.
